# Supplementary material for: Measurement of Ice Shelf Rift Width with ICESat-2 Laser Altimetry: Automation, Validation, and the behavior of Halloween Crack, Brunt Ice Shelf, East Antarctica
Source: Copernicus journal article supplement (doi:10.5194/tc-2023-63), 2023-05-10
Supplement: Supplementary file 1 [file tc-2023-63-supplement.pdf]

## 1 content of this file

1. Supplementary Text 1 to 5
2. Supplementary Figures 1 to 21
3. Supplementary Tables 1 to 9

## 5 2 Introduction

This file contains 5 Supplementary Texts, 21 Supplementary Figures and 9 Supplementary Tables. Supplementary texts S1 to S3 give further details on the rift detection and measurement workflow described in Sect. 3.1. Text S1 gives additional details of filtering applied to minimize erroneous rift wall detections, Text S2 describes the assignment of a confidence level to individual rift measurements, of particular relevance where the rift is bisected by an ice block and two measurements must be combined to calculate an “opening width” (see also Fig. S4). The combining of bisected rift measurements is discussed in Text S3. Text S4 discusses the production of a Digital Elevation Model (DEM) of Brunt Ice Shelf (BIS) using SlideRule ICESat-2 data. Text S5 discusses the *icepack* finite element ice flow modeling.

Fig. S1 shows the surface velocity field of BIS and the grounded ice immediately upstream in 2015, prior to the initiation of Halloween Crack (HC) (velocity data generated using auto-RIFT (Gardner et al., 2018) and provided by the NASA MEASUREs ITS\_LIVE project (Gardner et al., 2020)). The pinning point at McDonald Ice Rumples (MIR) can be seen to exert a strong control on ice shelf flow in the vicinity of the tips of Chasm 1, HC and North Rift (NR). The flow field can be seen to be discontinuous across Chasm 1, reflecting the widening of this rift. The locations of the four Global Navigation Satellite Systems (GNSS) receivers are shown, together with their flow velocity, and the rift-perpendicular component of flow velocity. The rift-perpendicular flow velocities are used to calculate ice flow divergence between the two receivers of each GNSS pair, and subtracted from the rift-perpendicular separation distance time series, providing a better approximation of the HC opening rate that would be measured by GNSS receivers placed close to the rift walls. This is compared to rift widths from ICESat-2 and digitized satellite imagery in Figs. 4, 5 and 6.

Fig. S2 shows HC digitized on a Landsat-8 OLI image from 2020-02-20 (Landsat image courtesy U.S. Geological Survey), the location of the four GNSS receivers used in this study as of 2018-02-15 (and an additional unused GNSS receiver), and the center of the nadir beam pair of the 17 ICESat-2 reference ground tracks (RGTs) which yield HC width estimates (see Table 1). Fig. S3 shows the movement of the GNSS receivers, and alignment and location of the RGTs, justifying the selection of those used. RGT 215 1LR and RGT 1160 3LR are approximately aligned with the western GNSS pair; RGT 786 2LR is oblique to the western GNSS pair, but measures a similar part of the rift; RGT 283 1LR and RGT 725 3LR are approximately aligned with the eastern GNSS pair; RGT 1099 2LR is oblique.

It can be seen in Fig. S3 that the western and eastern ends of HC differ in their characteristics. In the west the rift is wider and generally straight, with occasional large (semi-)detached ice blocks bisecting it (Fig. S4). In the east the rift is not as wide and exhibits a degree of meandering. Thus, width estimates from ICESat-2 or digitization of WorldView-1-3/Landsat-8 satellite images corrected for large-scale ( $\sim 10$  km) rift orientation are accurate in the west (Fig. 4), but are prone to overestimation in the east where the RGT occasionally aligns with a small-scale ( $\sim 1$  km) meanders (Fig. 5).

Fig. S4 shows the division of the rift by a large detached ice block, manifesting in the ICESat-2 ATL06 data as two separate troughs. Fig. S5 shows the origin of these isolated blocks and icebergs through the rift initiation and widening processes, and demonstrates why, when the blocks remain largely *in situ*, the “opening width” is the appropriate measurement to use in comparing rift width measurements from ICESat-2, Landsat-8 and WorldView-1-3 satellite imagery with GNSS receiver separation for the purpose of ICESat-2 rift width measurement algorithm validation in Figs. 4 and 5. Tables S3 and S6 record both “opening width” and “wall-to-wall” width. Fig. S6 shows how small-scale meanders can lead to overestimation of rift width. Underestimation could also occur in meandering areas of the rift due to shear.

The ICESat-2 measurements used in Figs. 4 and 5 are shown in Figs. S7 to S14. Figs. S7 and S8 show detections along RGT 215 1LR, Fig. S9 along RGT 1160 3LR, Figs. S10 and S11, along RGT 786 2LR, Fig. S12 along RGT 283 1LR, Fig. S13 along RGT 725 3LR, and Fig. S14 along RGT 1099 2LR. High confidence detections are shown in light red, five lower con-

45 fidence detections (light orange) of small parts of the rift separated from the main rift by (semi-)detached ice blocks, and combined with the high confidence detections to calculate the “opening width” are shown in Figs. S9i, S9j, S11c, S11i and S12a. Width measurements along RGT 215 1LR on 2019-07-12 (Fig. S7d–f), along RGT 1160 3LR on 2018-12-13 (Fig. S9b–c), along RGT 786 2LR on 2018-11-19 and 2019-02-17 (Fig. S10a–f), along RGT 283 1LR on 2018-10-17 (Fig. S12a–c), along RGT 725 3LR on 2018-11-15 (Fig. S13a–c), and along RGT 1099 2LR on 2019-03-10 (Fig. S14a–c) were not used in  
50 Figs. 4 and 5 due to satellite pointing errors.

The ICESat-2 rift width/opening rate measurements - and by extension the rift measurement algorithm - are validated using digitized rift width measurements using satellite imagery and the divergence-corrected separation of two pairs of GNSS receivers (Figs. 4, 5, 6). Whilst the ICESat-2 RGTs along which rift width is measured using ICESat-2 and digitized satellite imagery are fixed in space (Eulerian frame of reference), HC and the GNSS receivers are moving with ice flow (Figs. 1 and S1) largely east to west. The rift parallel (and approximately ICESat-2-RGT-perpendicular) component of velocity near the GNSS pair baselines varies from  $\sim 700$  to  $\sim 1000$   $\text{m a}^{-1}$  depending on location and time (as ice flow accelerates following calving from NR), according to the modeled velocity fields. Fig. S15 shows modeled HC opening rate ( $\text{m a}^{-1}$ ) with different flow law parameters and assumptions on location of maximum opening. It shows the difference in opening rate for locations approximating the western and eastern GNSS pair baselines, and points 1 km upstream, showing the potential effect of ice  
55 flow on the comparison between the three independent rift width measurement datasets. In all cases the opening rate 1 km upstream is within  $10$   $\text{m a}^{-1}$  of that at the GNSS locations. It therefore does not qualitatively effect our comparison of the three datasets. However, we note that the difference can become important closer to the rift tip(s), over long time periods, or where the displacement of ice perpendicular to the ICESat-2 RGTs over the period under consideration is a significant proportion of the rift length.

65 Fig. S16 shows the ice thickness (a–c) and ice velocity (g–i) inputs to the *icepack* ice flow models for “pre-calving”, “calving” and “post-calving” periods. The thickness DEM is explained in more detail in Text S4. The feature-tracking workflow within ESA’s SeNtinel Applications Platform (SNAP) was applied to pairs of Sentinel-1 SAR scenes to create the velocity maps. The change in feature-tracked flow speed and direction between the “pre-calving” period and the “calving” and “post-calving” periods is shown in h and i insets, j and k. Fig. S17 shows modeled ice velocity (a–c) and modeled fluidity parameter (f–h)  
70 outputs from the inverse models for the three periods, and ice flow acceleration (d, e) between the “pre-calving” period and the “calving” and “post-calving” periods.

Figs. S18, S19, S20 and S21 show ICESat-2 elevation along RGTs which cross the calving fronts prior to and following calving from NR. We do not observe large and consistent changes in calving front freeboard (and hence ice thickness) which could explain the change in HC opening rate observed.

75 Tables S1, S2 and S5 identify the WorldView-1-3, Landsat-8 and Landsat-9 satellite images on which HC width was measured. Measurements shown are aligned with RGTs, and are corrected for the obliquity of the RGT to the rift-perpendicular plane prior to comparison with measurements from ICESat-2 and GNSS receiver separation distances in Figs. 4 and 5. Tables S3 and S6 show the “opening width” and where applicable also the “wall-to-wall” width from WorldView-1-3 and Landsat-8 imagery respectively, for RGT 215 1LR, RGT 1160 3LR and RGT 786 2LR used in Fig. 4. Tables S4 and S7 show the corresponding  
80 values for RGT 283 1LR, RGT 725 3LR and RGT 1099 2LR used in Fig. 5.

Table S8 lists the Sentinel-1 SAR and Sentinel-2 and Landsat-8 optical images used in the *icepack* inverse modeling shown in Fig. 7. A feature tracking algorithm is used to extract ice flow fields from pairs of Sentinel-1 SAR images using the SeNtinel Applications Platform (SNAP). Sentinel-2 and Landsat-8 optical images are used to define the model domain. Table S9 presents the rates of HC opening for areas between the western and eastern GNSS pairs from inverse models for the “pre-calving”, “calving” and “post-calving” periods, and diagnostic models using modeled velocity, “pre-calving” modeled fluidity and “calving” and “post-calving” geometry (Text S5). The models were run with ice temperatures of 253 K and 260 K.

### 3 Text S1. Filtering

90 A number of filters and thresholds were applied throughout the rift detection and measurement workflow to maximise the reliability of the rift width measurements. Each beam from each satellite pass was processed independently. Prior to rift detection and measurement, any  $\sim 4$  km sections with  $>20$  % of elevations flagged as low quality were discarded. Further, any unrealistic elevations ( $>100$  m) were discarded whether flagged as low quality or not. Any beams with  $>3$  % of gaps between elevation measurements exceeding 25 m were discarded. Rift detections were only processed if  $<25$  % of elevations within the expanded search area around the lowest point were flagged as low quality (Fig. 2b).  
95 If the mean separation of elevations within each selected rift wall exceeded 50 m or there were fewer than three elevation measurements, the rift measurement was skipped. Rift width measurements from early satellite passes with substantial pointing errors (Figs. S7d–f, S9a–c, S10a–f, S12a–c, S13a–c, S14a–c) were not used for the validation against rift width measurements from optical satellite data and the separation of GNSS receivers.

#### 4 Text S2. Confidence

100 Rift detections were assigned a confidence level of “high”, “medium” or “low”. A potential rift was defined as any ATL06  
points below 50 % of a 10 km smoothed surface. For each potential rift detection, the algorithm defined an extended search  
window centered on the lowest elevation point. If the elevations either side of the lowest point exceeded 80 % of the elevation  
of the smoothed surface, the detection was assigned a “high” confidence. If elevations on either or both sides of the rift were  
105 between 50 % and 80 % of the elevation of the smoothed surface, the detection was assigned a “medium” confidence. In the case  
of “high” and “medium” confidence detections, the steepest slopes were found and width measured as described in Sect. 3.1.  
If neither threshold was satisfied, the detection was assigned a “low” confidence, and the width was defined as the extent of  
the ATL06 points below the 50 % of running mean threshold used for initial rift detection. Measurements based on “medium”  
and “low” confidence detections were discarded unless they were merged with a “high” confidence detection where the rift  
was bisected by an iceberg or semi-detached ice block. This ensured that rift width measurements were primarily based on  
110 “high” confidence detections, but that the rift width was not frequently underestimated as a result of discarding measurements  
of “medium” or “low” confidence detections of generally narrow sections of the rift near the point of attachment of an ice block  
or recent detachment of an iceberg (Figs. S9h–i and j–k, S11b–c and h–i).

## 5 Text S3. Merging

115 Large icebergs or semi-detached ice blocks held in place by ice mélange occur at several locations along HC, originating from the initiation of rifting (Fig. S5). If an ICESat-2 beam passes over one of these *in situ* blocks, the rift is divided into two closely spaced troughs (Figs. S7a–f, S9d–k, S10d–f and j–l, S11a–i, S12a–c). For validation of the rift widths and rift opening rates from ICESat-2 with measurements from GNSS receivers, it is necessary to merge the two measurements to calculate a total “opening width” (Figs. S4 and S5). Any pair of rift measurements on the same date and along the same beam were merged if they were separated by less than a distance limit of 500 m. The “opening width” was calculated as the sum of the individual widths, with the “wall-to-wall” width also calculated as the distance between the most landward and most seaward walls (Fig. S4). This distance limit was found to be sufficient for the current study, where detections of rifts other than HC are discarded (based on a location polygon defined using multi-temporal satellite imagery), and iceberg/block widths are ~100 m. More advanced merging tools may be required for other ice shelves based on rift separation distance and iceberg/block size.

120 Medium or low confidence rift measurements (Text S2) were often narrow rift sections near the point of attachment of an ice block to the rift wall, or the point of recent detachment of an iceberg (Figs. S9h–i and j–k, S11b–c and h–i). These were combined with neighboring high confidence measurements as described above. Where no high confidence measurement existed within the distance limit, the rift observation was discarded (i.e. no “opening width” measurement was a combination of two medium or low confidence measurements, and medium or low confidence measurements which were not combined with a high confidence measurement were discarded).

125

The *icepack* model requires an ice shelf thickness DEM covering the entire domain. Prior to the 2021 calving from NR, BIS was advancing, and thus freely available ice shelf freeboard or thickness datasets with timestamps prior to the period of interest (2020–2021) do not cover the entire domain. We therefore used ICESat-2 data to create a new thickness DEM. We used sliderule (Swinski et al., 2022) to obtain elevation estimates derived from ICESat-2 data during the period 2020-01-01 and 135 2021-02-01 (immediately prior to NR calving). These were interpolated onto a regular grid, and converted to freeboard using the EGM2008 geoid model (Pavlis et al., 2012) and a mean dynamic topography estimate of -1.7 m (Andersen and Knudsen, 2009). We then extrapolated the BedMachine Antarctica (Morlighem, 2020) firm air content field to cover the domain, and subtracted it from the freeboard. Finally, we converted freeboard to thickness using an ice density of  $900 \text{ kg m}^{-3}$  and sea water density of  $1027 \text{ kg m}^{-3}$ . The same thickness model is used for the “pre-calving”, “calving” and “post-calving” model runs, 140 cropping to the appropriate domain to simulate the calving of the iceberg from NR. We varied the thickness by  $\pm \sim 20 \text{ m}$  and repeated some model runs to test the impact of thickness uncertainty, finding little change in the modeled rate of HC opening.

## 7 Text S5. Ice flow model

We conducted *icepack* model runs additional to the inverse models detailed in the main manuscript to investigate the importance of changes in geometry, velocity, and fluidity. These model runs are labeled “Diagnostic<sub>1</sub>” to “Diagnostic<sub>9</sub>” in Table S9, and were run with ice temperatures of 253 K and 260 K. Modeled velocity (used to define ice flow into the model domains across the grounding zone, divide between BIS and SWIT, and from MIR) and fluidity field outputs from the inverse models were resampled onto regular grids and the *fill* tool in QGIS used to interpolate across rifts and extrapolate beyond the calving front. This allowed fields to be used interchangeably regardless of the advection of rifts with ice flow, or changes in calving front position. “Diagnostic<sub>1</sub>” is a repeat of the “pre calving” inverse model to test the impact of resampling and interpolation on HC opening rates. Opening rates were within  $\sim 10 \text{ m a}^{-1}$  of the rates from the inverse model except for the western GNSS pair at 253 K where the rate was overestimated by  $\sim 30 \text{ m a}^{-1}$ . For model runs “Diagnostic<sub>2</sub>” to “Diagnostic<sub>5</sub>” ice flow into the domain and the ice shelf fluidity were kept constant and the geometry was changed to “calving” and “post-calving” geometries, with HC either in its “pre-calving” geometry (to negate the potential impact of fluidity field interpolation across the rift) or in its corresponding “calving”/“post-calving” geometry. In all cases the modeled HC opening rate remained close to “pre-calving” rate, in contrast to the observations from ICESat-2, satellite imagery, and GNSS receiver separation, and the “calving” and “post-calving” inverse models. This shows that additional changes resulting from the geometry change are necessary to explain the observed pattern of HC opening. For model runs “Diagnostic<sub>6</sub>” to “Diagnostic<sub>9</sub>” only the “pre-calving” modeled fluidity was held constant. “Calving” and “post-calving” ice shelf geometries were used, and runs repeated with the HC in the corresponding geometry or “pre-calving” geometry as discussed above. “Calving” and “post-calving” modeled velocity was used as input at the domain boundaries. In these models the observed pattern of a decrease of HC opening rate approaching stagnation immediately after calving, before a return to opening is replicated, though with some offsets between the results from the inverse and “Diagnostic” models, particularly in the “post-calving” period. This maybe due to uncertainties introduced by the resampling and interpolation, though may also reflect the impact of changes in the fluidity field of the wider ice shelf (which likely show the opening of fractures close to the grounding zone). We therefore conclude that the changes in HC opening rate result from changes in BIS geometry following calving from NR, and the resulting reorganisation of ice flow, though additional fracturing, manifesting as increases in fluidity may play a secondary role.

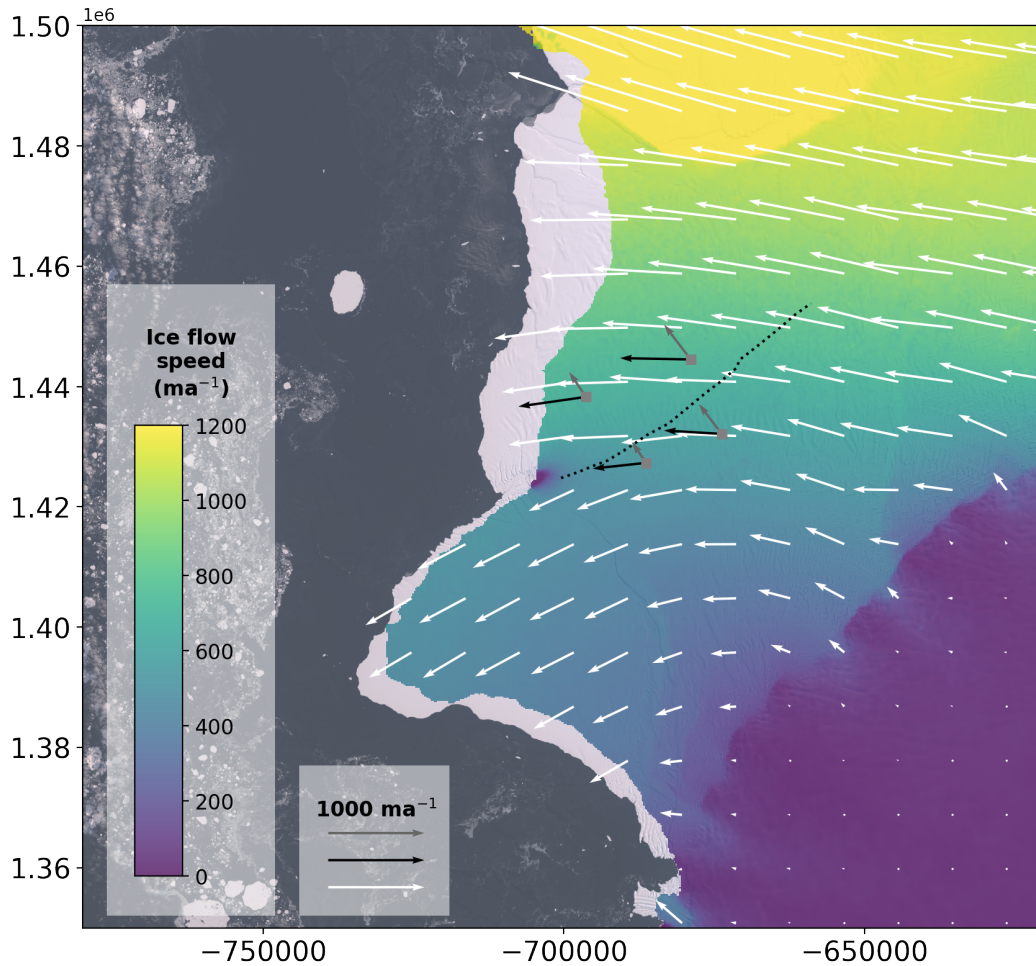

**Figure 1.** Brunt Ice Shelf surface flow speed field in 2015, prior to HC initiation, using velocity data generated using auto-RIFT (Gardner et al., 2018) and provided by the NASA MEaSUREs ITS\_LIVE project (Gardner et al., 2020). Note the impact on the flow field of the pinning point at McDonald Ice Rumples. The black dashed line shows the large-scale axis of HC, gray squares show the mean location of the GNSS receivers, white arrows show the direction and magnitude of ice flow, black arrows show ice flow at the locations of the GNSS receivers, gray arrows show the rift-perpendicular component of ice flow at the locations of the GNSS receivers. The rift-perpendicular components of ice flow were used to remove ice flow divergence from the time series of GNSS receiver pair separation distance used in Figs. 4, 5 and 6. Removing the divergence approximately reconstructs the time series of separation that would be measured by pairs of GNSS receivers close to the walls of HC.



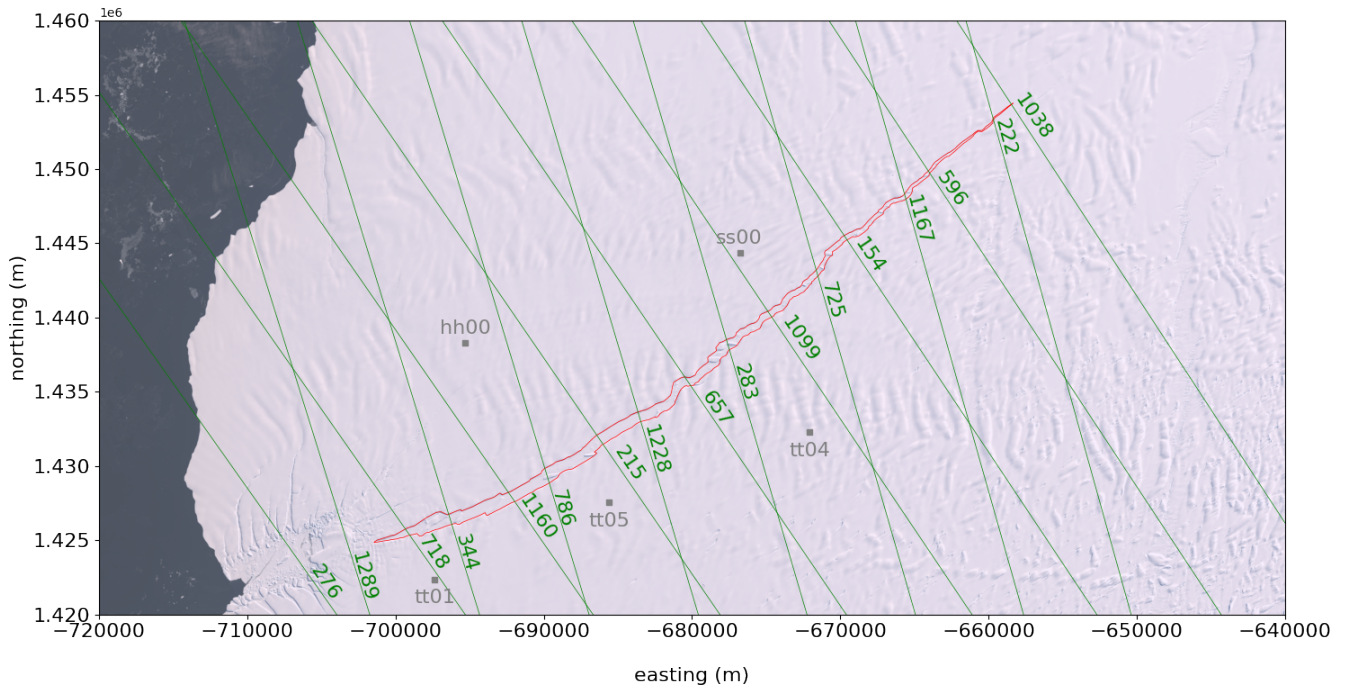

**Figure 2.** Centers of the nadir beam pair of 17 reference ground tracks (green, numbered), along Halloween Crack (red), on a Landsat-8 OLI image from 2020-02-20. Gray squares show the 2018-02-15 locations of the four GNSS receivers used in this study (the “western pair”: hh00 and tt05, and the “eastern pair”: ss00 and tt04) and unused GNSS receiver tt01.

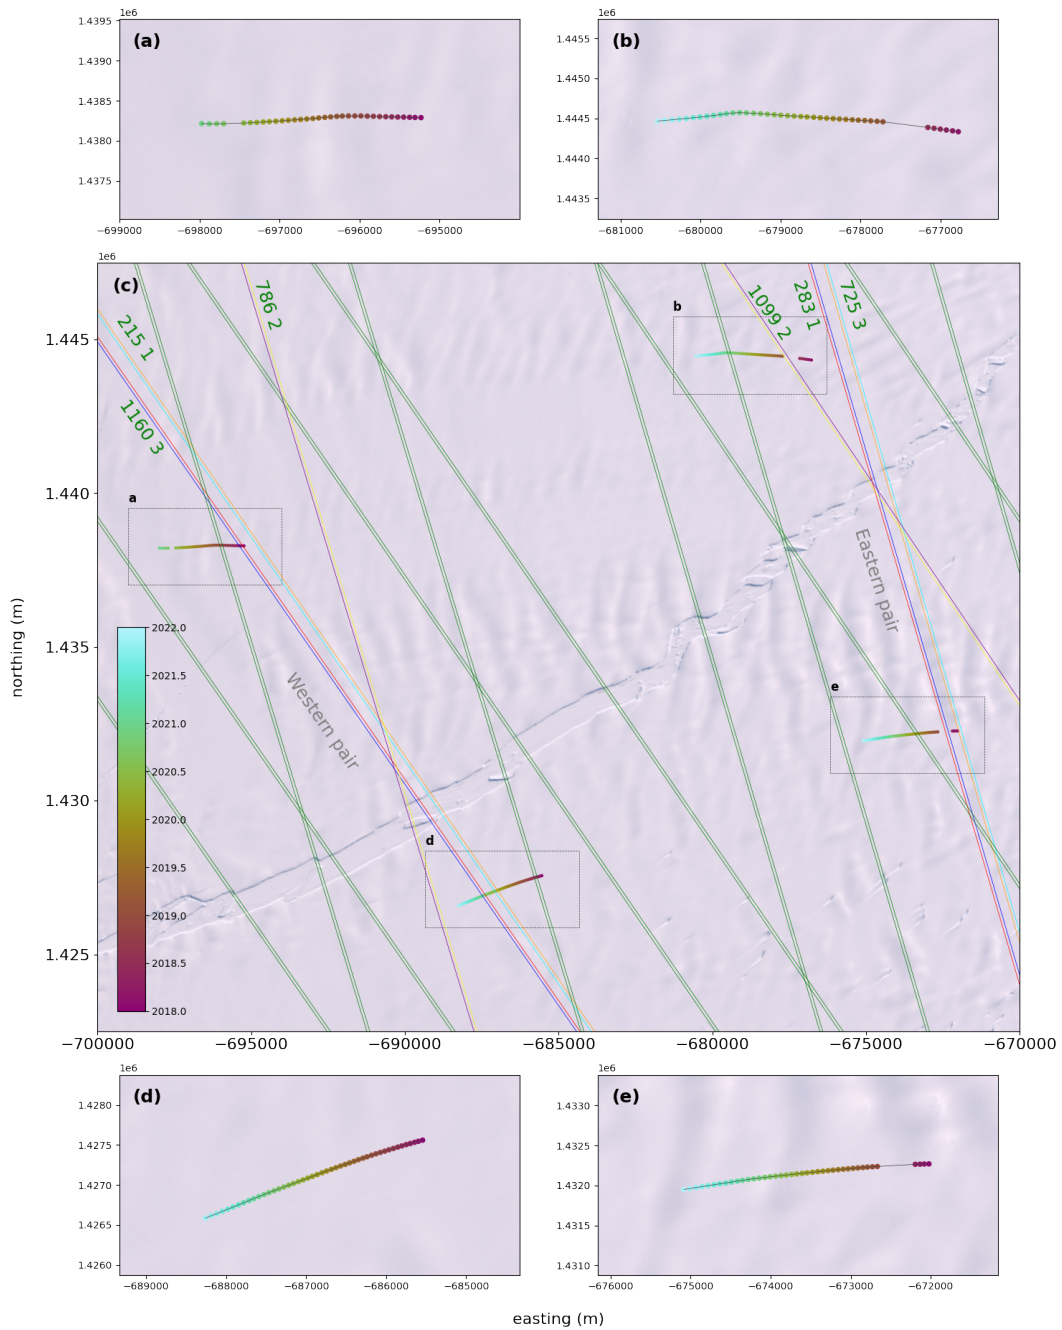

**Figure 3.** Movement of the GNSS receivers with ice flow. The six RGT beam pairs (RGT 215 1LR, RGT 1160 3LR, RGT 786 2LR, RGT 283 1LR, RGT 725 3LR, RGT 1099 2LR) used for comparison with rift-perpendicular opening rates between pairs of GNSS receivers are shown, colors correspond to Figs. 1, 4, 5 and 6.

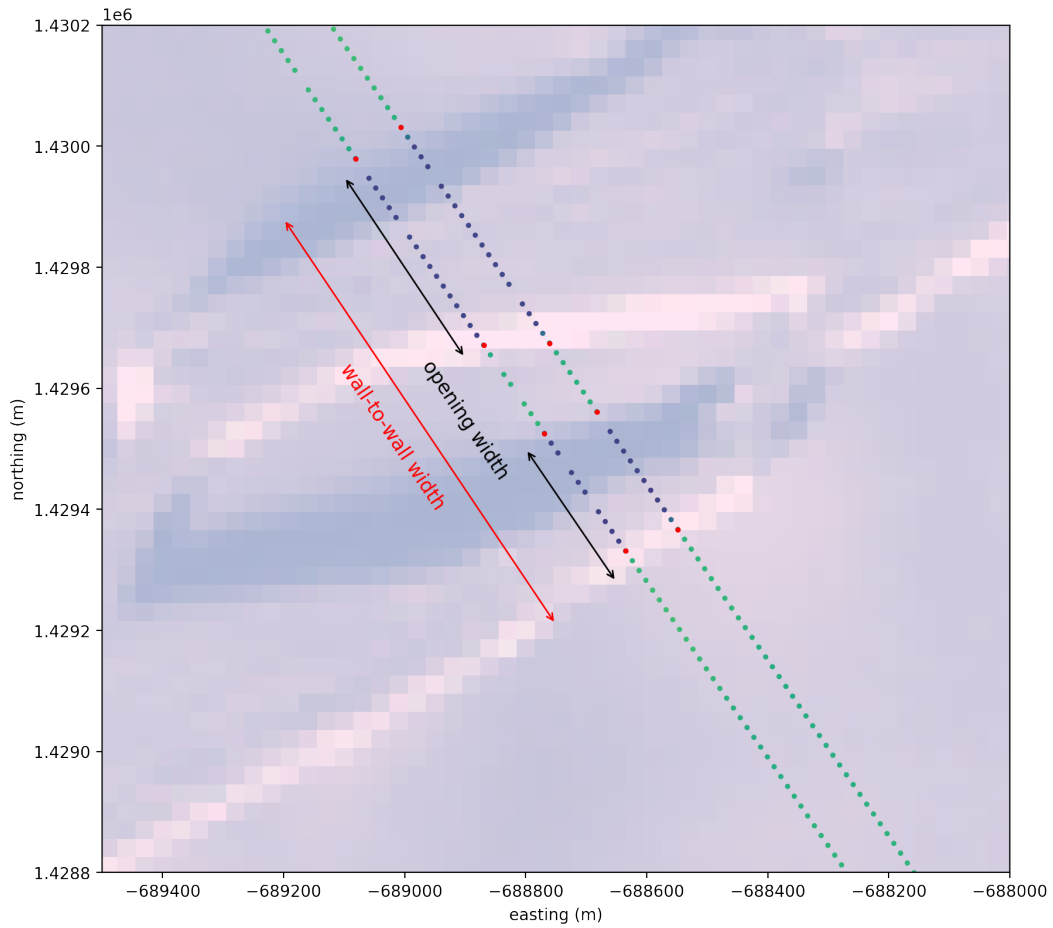

**Figure 4.** Rift “opening width” (the distance the rift has opened, ignoring the iceberg within the rift) and “wall-to-wall width” (the total distance between the seaward and landward rift walls) on a Landsat-8 image from 2019-04-12.

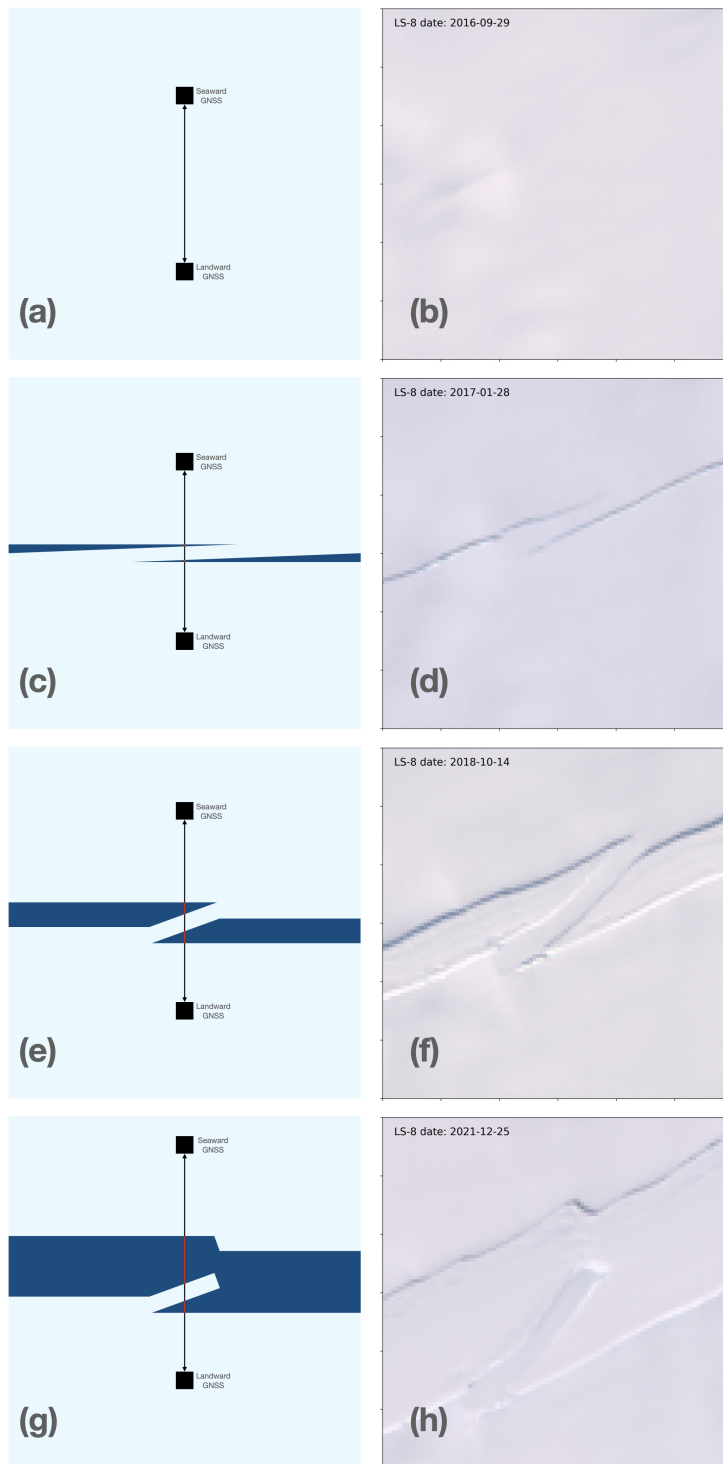

**Figure 5.** Schematic demonstrating why “opening width” (red) is the appropriate width to use when comparing widths from ICESat-2 and satellite imagery with GNSS receiver separation.

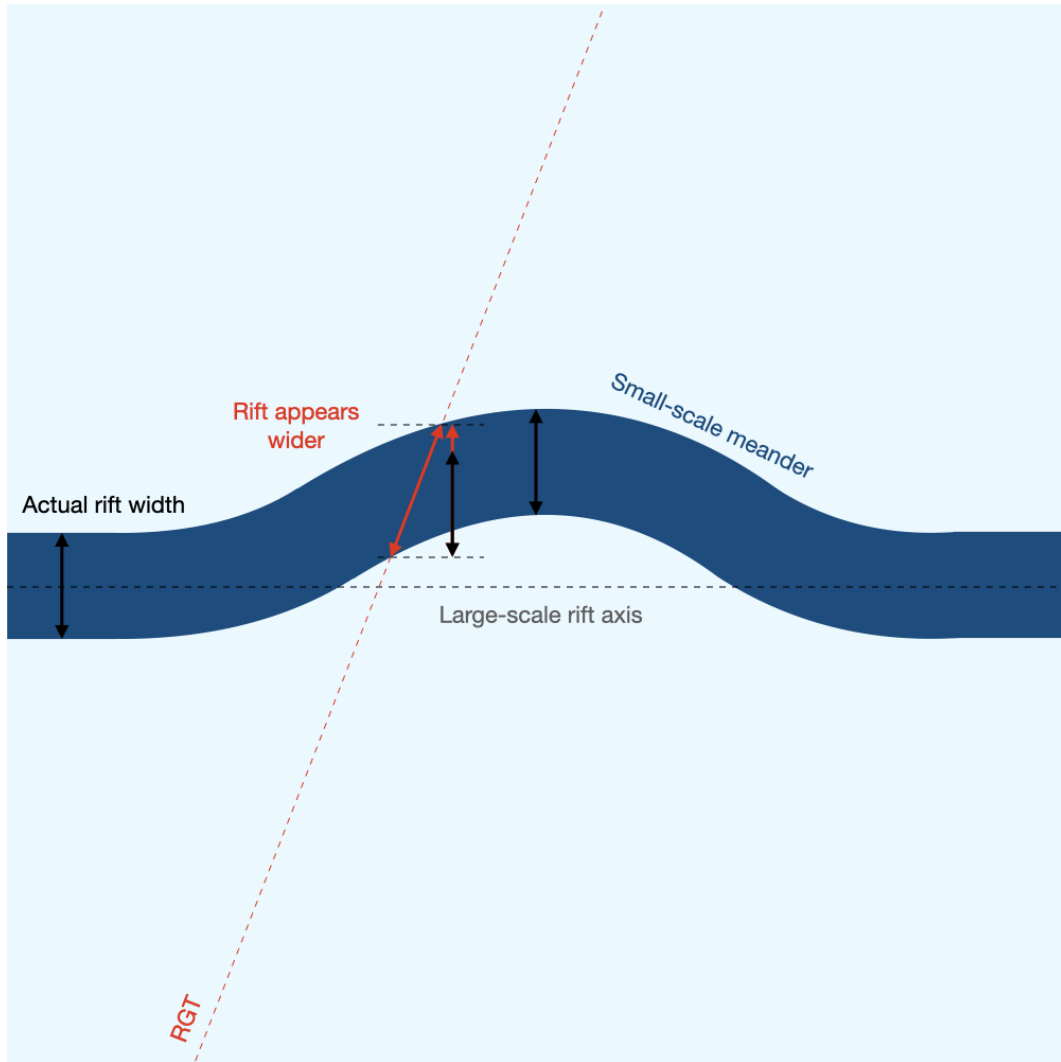

**Figure 6.** Schematic demonstrating the effect of small-scale meanders, caused by rift propagation between meteoric ice blocks (De Rydt et al., 2018; King et al., 2018), on rift width measurement. This is the situation for HC between the eastern pair of GNSS receivers, and may account for the occasional overestimation of rift width in Fig. 5. Red arrows show the measured rift width along the RGT and component perpendicular to the large-scale rift axis, compared to the actual rift width (black arrows).

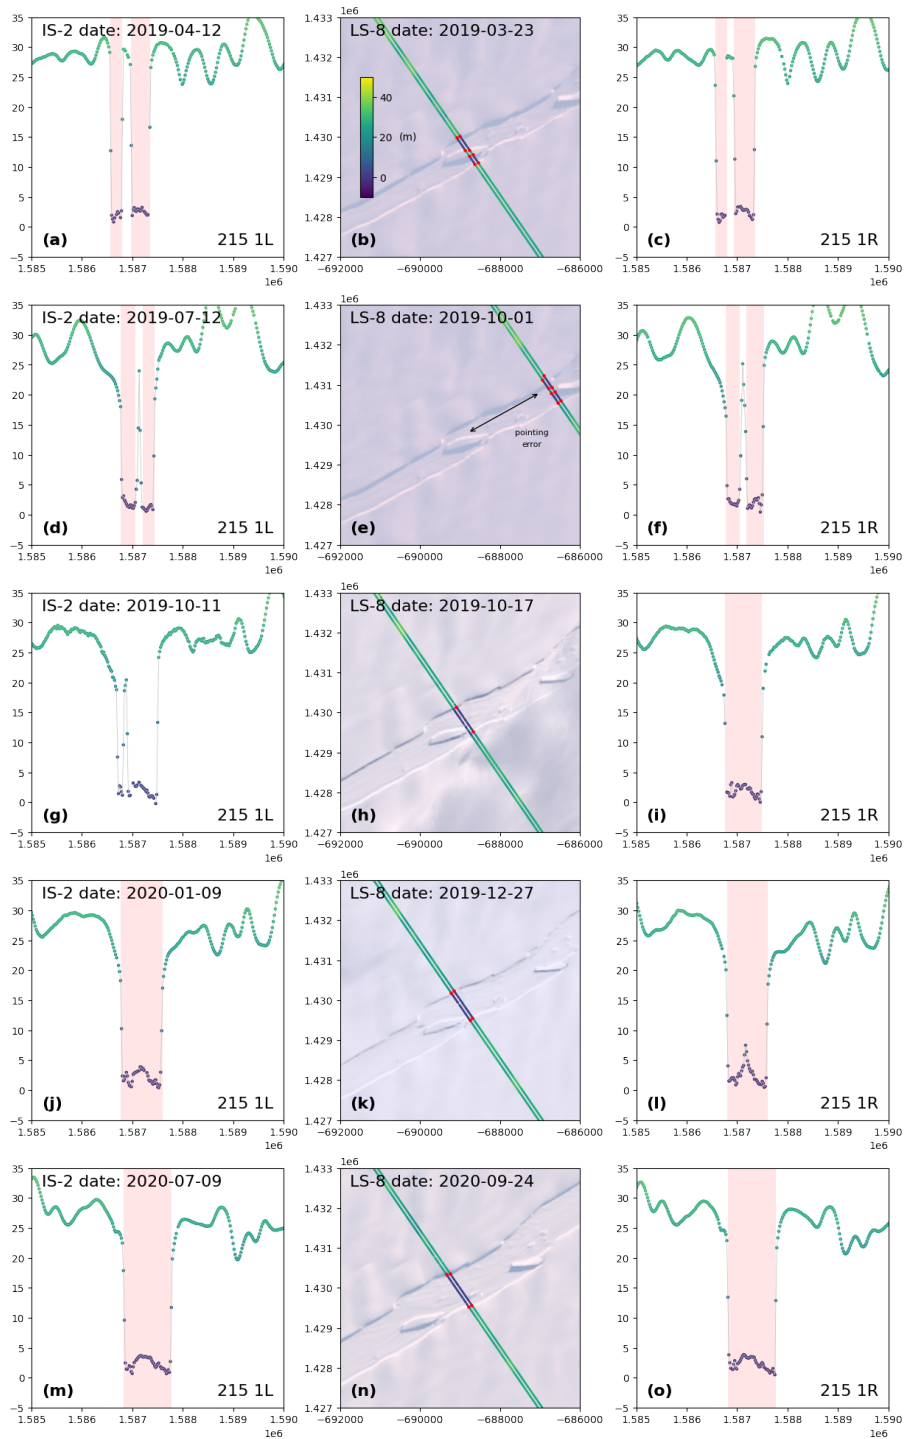

**Figure 7.** Example detections used in Fig. 4d and f along RGT 215 1LR. High confidence rift measurements are shown in light red. Note the satellite pointing error on 2019-07-12.

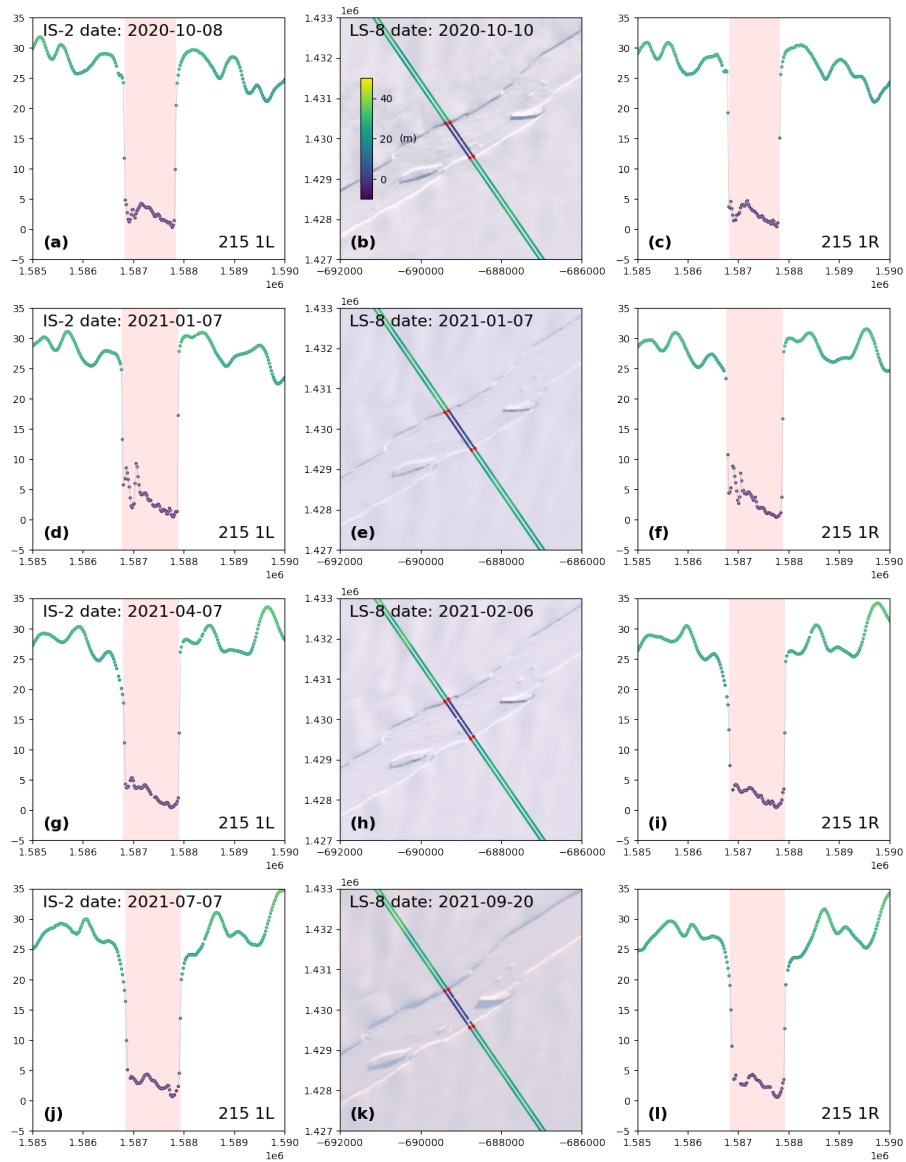

**Figure 8.** Example detections used in Fig. 4d and f along RGT 215 1LR (continued). High confidence rift measurements are shown in light red.

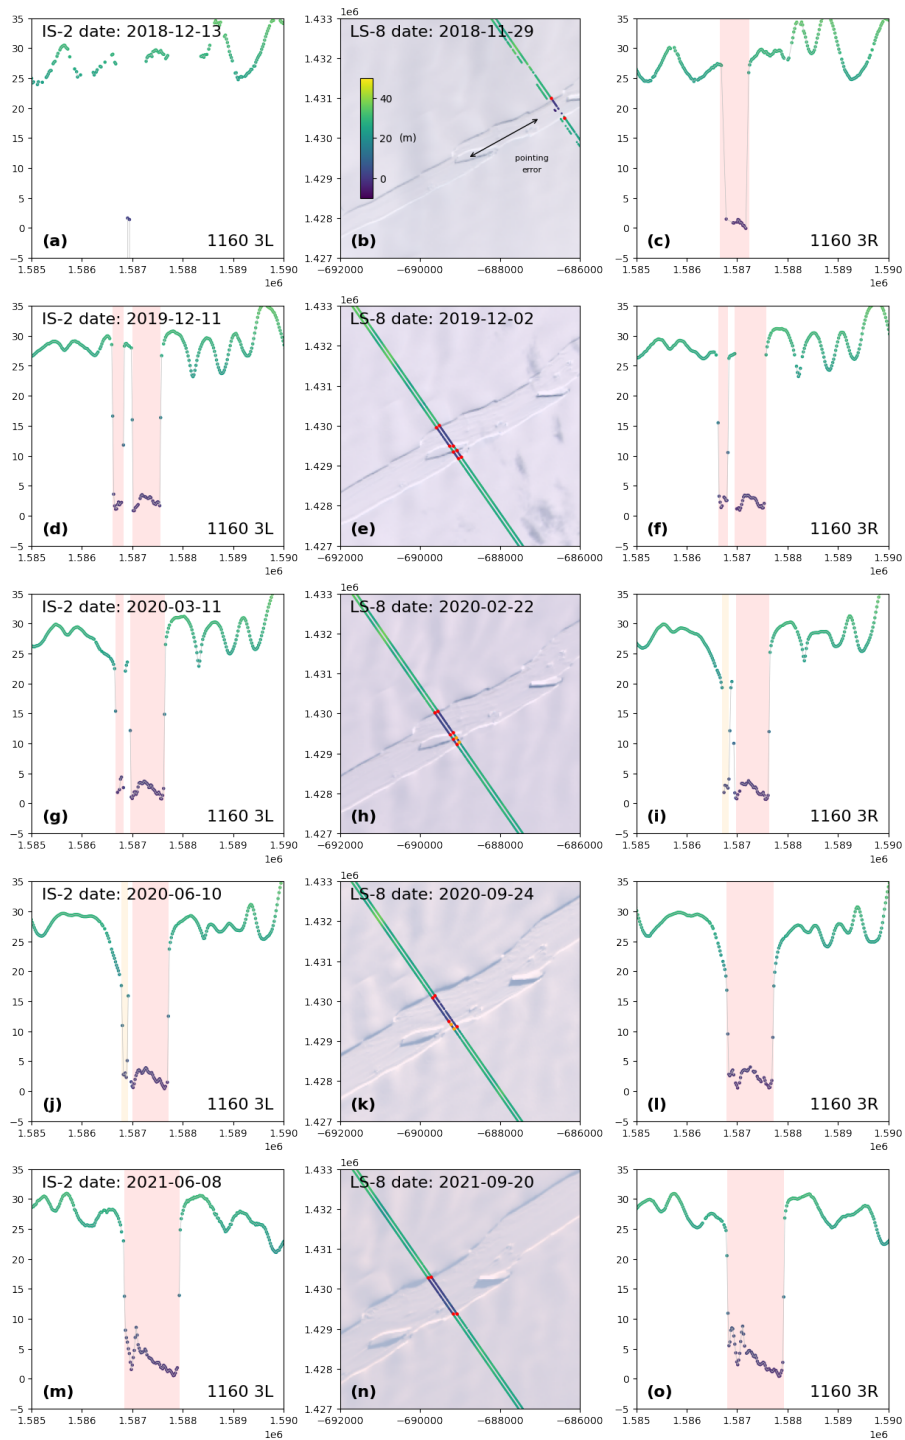

**Figure 9.** Example detections used in Fig. 4a and c along RGT 1160 3LR. High confidence rift measurements are shown in light red, lower confidence measurements in light orange. Note the ICESat-2 pointing error on 2018-12-13.



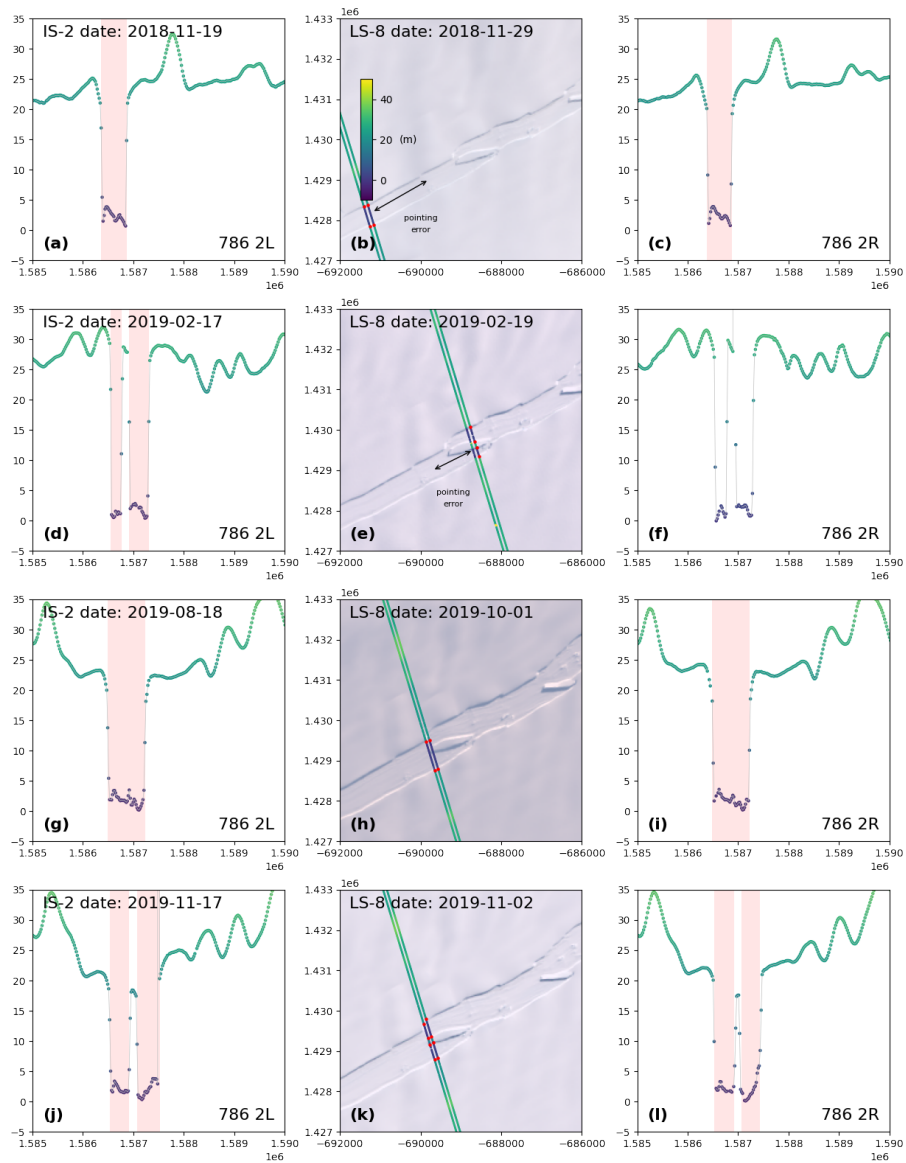

**Figure 10.** Example detections used in Fig. 4g and i along RGT 786 2LR. High confidence rift measurements are shown in light red. Note the ICESat-2 pointing errors on 2018-11-19 and 2019-02-17.

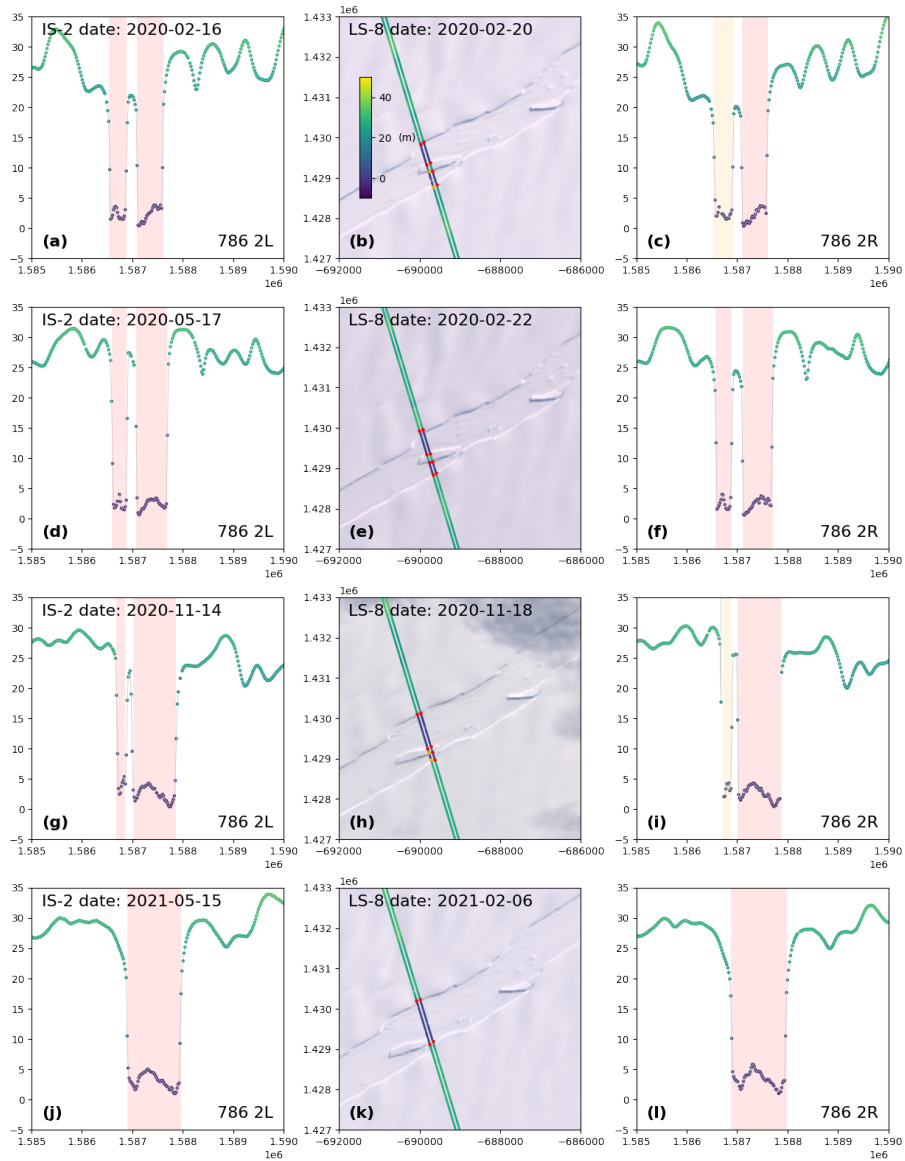

**Figure 11.** Example detections used in Fig. 4g and i along RGT 786 2LR (continued). High confidence rift measurements are shown in light red, lower confidence measurements in light orange.

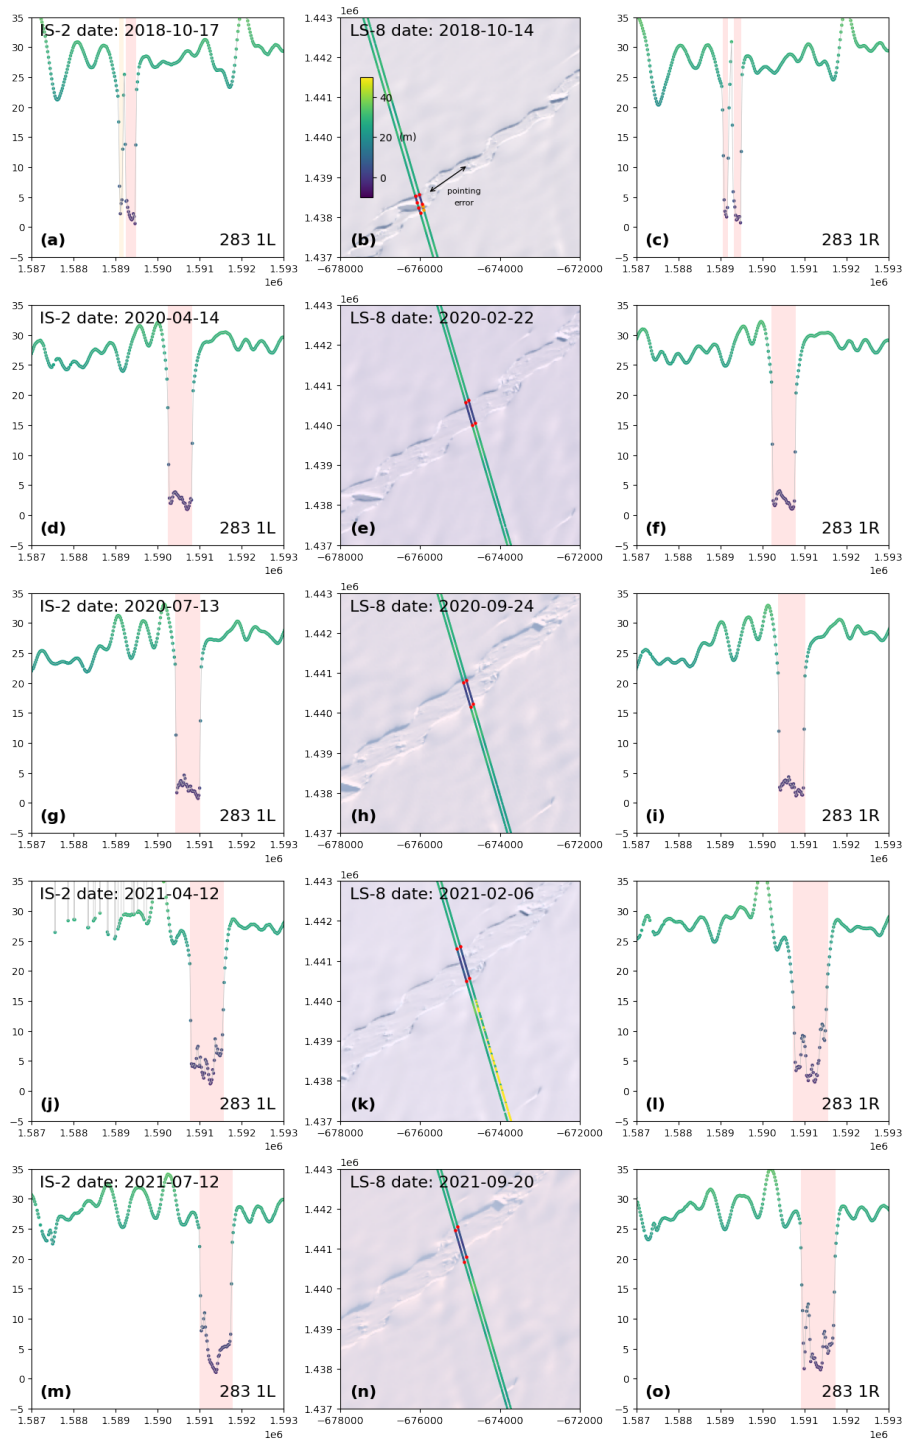

**Figure 12.** Example detections used in Fig. 5a and c along RGT 283 1LR. High confidence rift measurements are shown in light red, lower confidence measurements in light orange. Note the ICESat-2 pointing error on 2018-10-17.

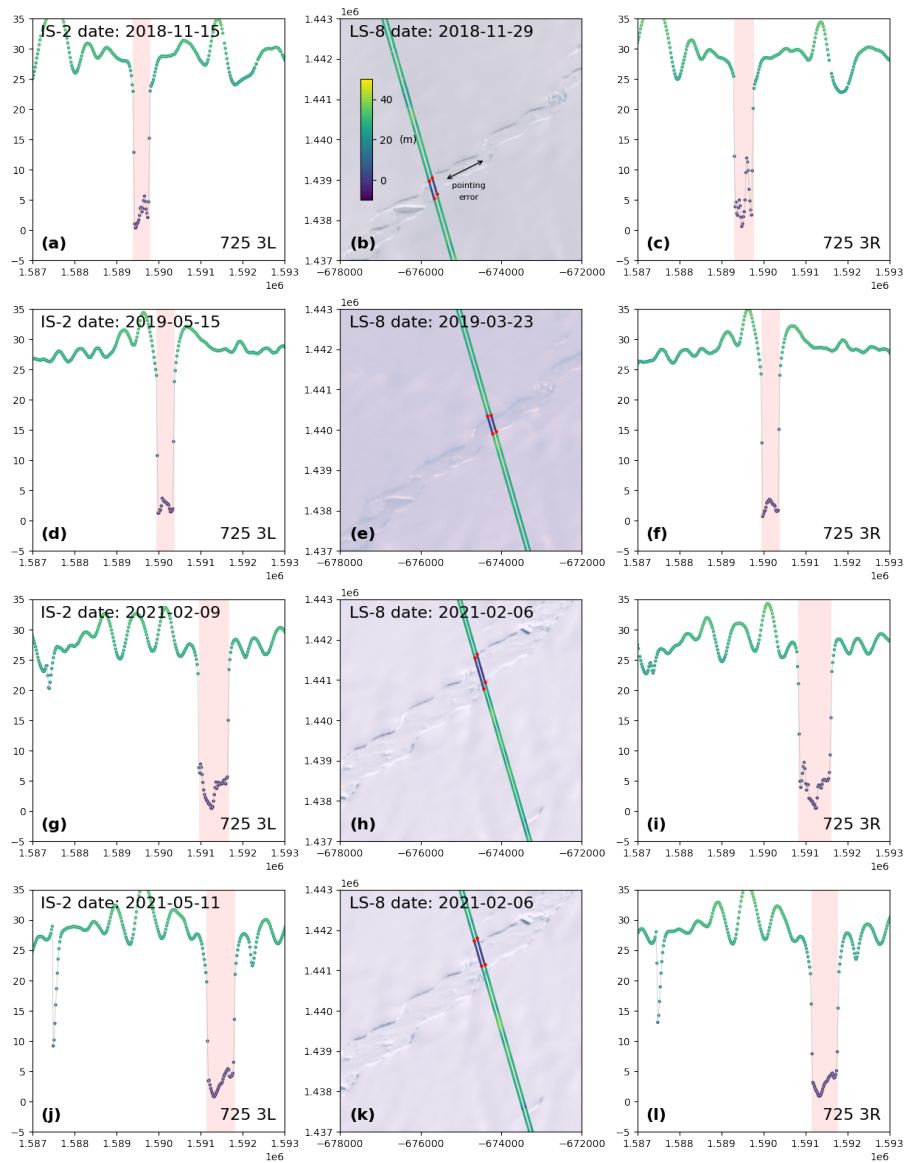

**Figure 13.** Example detections used in Fig. 5d and f along RGT 725 3LR. High confidence rift measurements are shown in light red. Note the ICESat-2 pointing error on 2018-11-15.

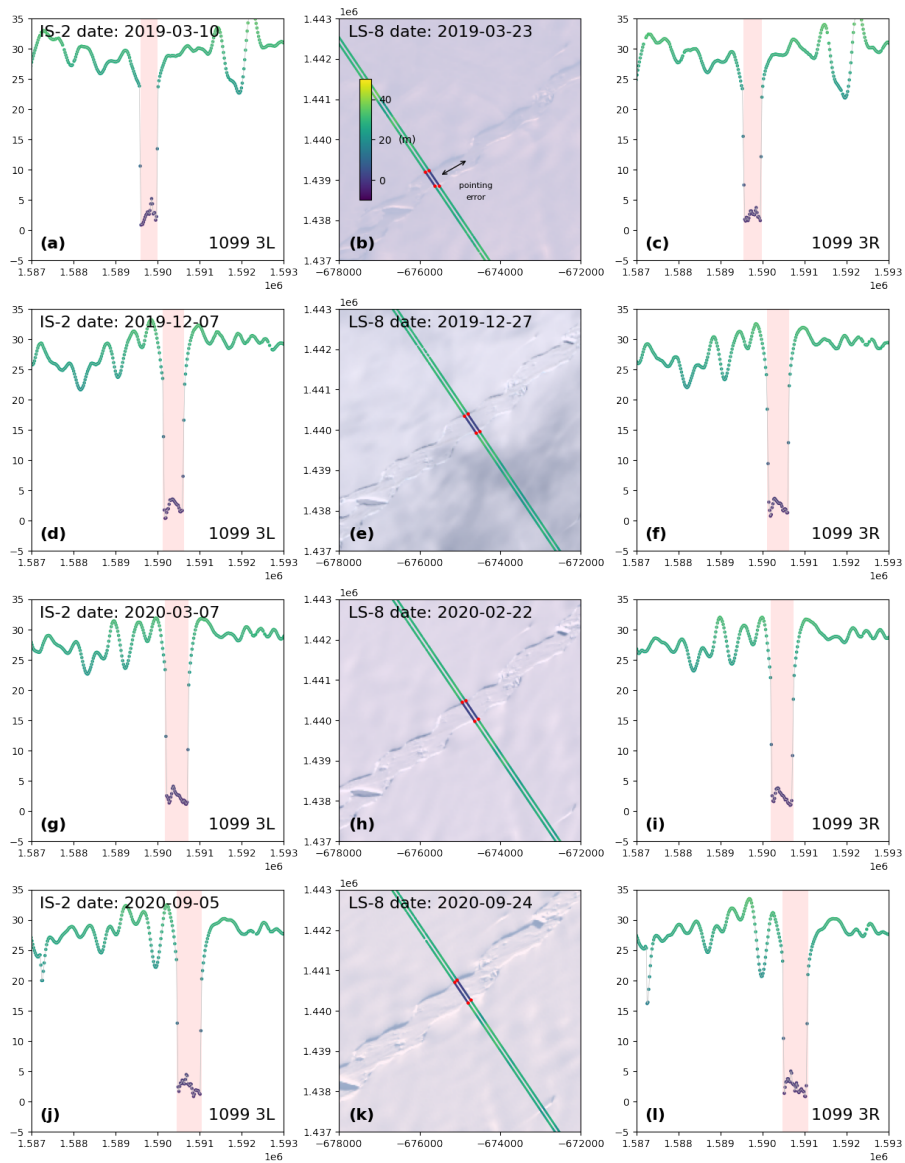

**Figure 14.** Example detections used in Fig. 5g and i along RGT 1099 2LR. High confidence rift measurements are shown in light red. Note the ICESat-2 pointing error on 2019-03-10.

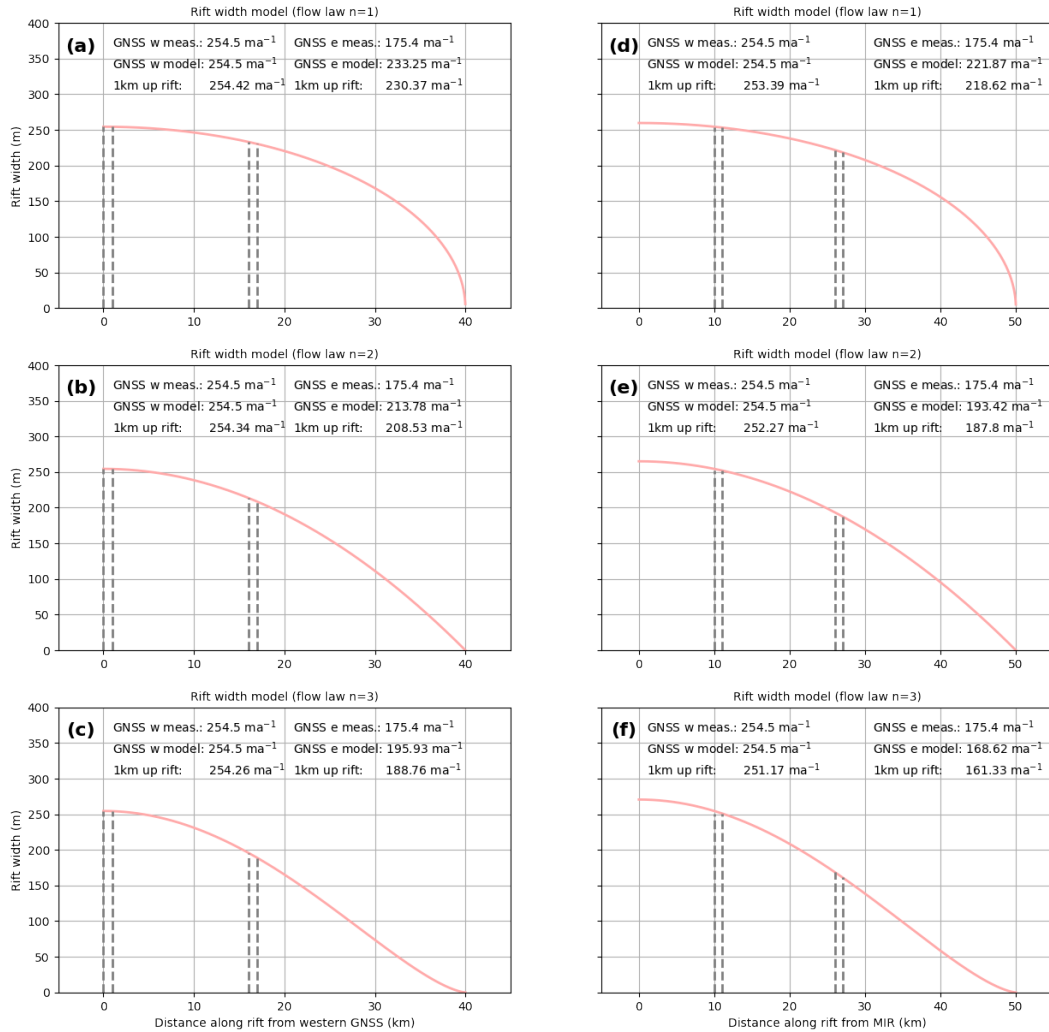

**Figure 15.** The effect of Lagrangian (GNSS) and Eulerian (ICESat-2 and satellite imagery) frames of reference on ICESat-2 rift measurement algorithm validation, resulting from the  $\sim 700\text{--}1000 \text{ m a}^{-1}$  flow of HC approximately perpendicular to ICESat-2 RGTs. Modeled HC opening rates ( $\text{m a}^{-1}$ ) with different flow law parameters ( $n$ ) assuming (a–c) that maximum opening occurs between the western GNSS pair or (d–f) that maximum opening occurs near MIR (50 km from the eastern rift tip). Dashed lines at 0 km and 1 km along rift in a–c and 10 km and 11 km along rift in d–f show the approximate locations of the western GNSS pair and a point 1 km upstream. Dashed lines at 16 km and 17 km along rift in a–c and 26 km and 27 km along rift in d–f show the corresponding approximate locations of the eastern GNSS and a point 1 km upstream. GNSS w/e meas. shows the divergence corrected opening rates from Fig. 6. GNSS w/e model shows the modeled opening rate at the GNSS locations (maximum opening values in d–f were modified until the modeled opening rate at the western GNSS pair agreed with observations). 1 km up rift shows the modeled opening rate 1 km upstream of the GNSS pair locations. In all instances, the difference between modeled and 1 km upstream opening rates is less than  $10 \text{ m a}^{-1}$ , and larger for the eastern GNSS pair, which is closer to the rift tip.

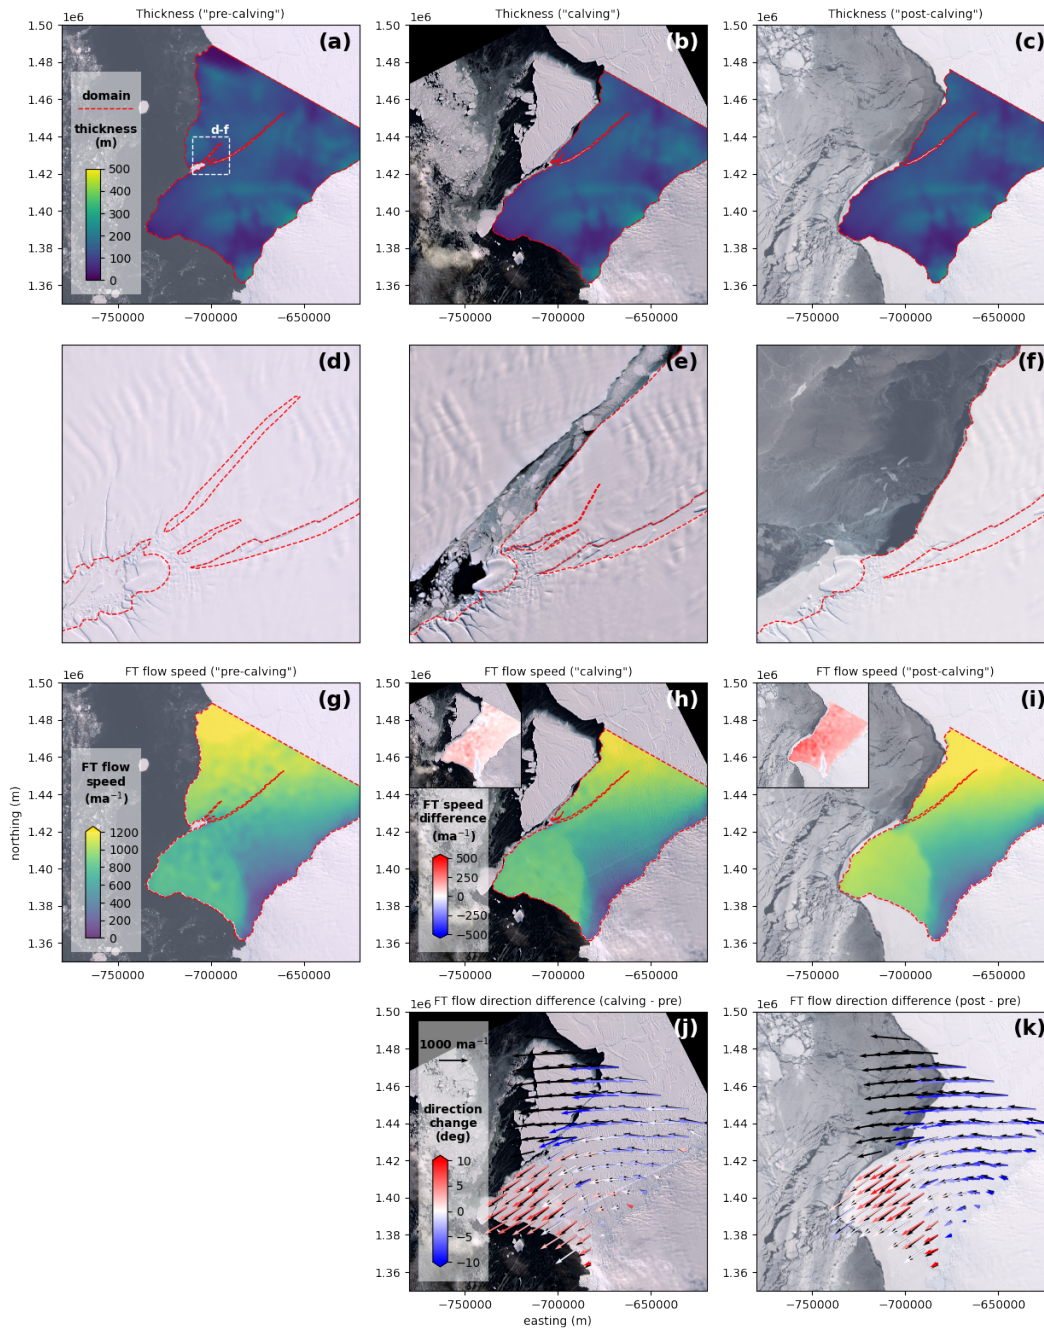

**Figure 16.** *icepack* model inputs. (a–c) Ice shelf thickness DEM cropped to the “pre-calving”, “calving” and “post-calving” domains (dashed red lines). Dashed white box in a show the location of d–f. (d–f) Fractures in the vicinity of McDonald Ice Rumples in the 3 domains. d includes the ~13 km-long beginning of North Rift. (g–i) Ice flow speed from feature tracking of Sentinel-1 SAR scene pairs. Insets show ice flow speed change compared to prior to calving from NR, demonstrating an increase in ice flow speed. (j, k) Ice flow direction and magnitude change compared to prior to calving. Black arrows show “pre-calving” velocity, colored arrows show “calving” (j) and “post-calving” (k) velocity, highlighting acceleration and angular change in flow direction (red shows clockwise redirection of flow, blue shows anti-clockwise redirection of flow).

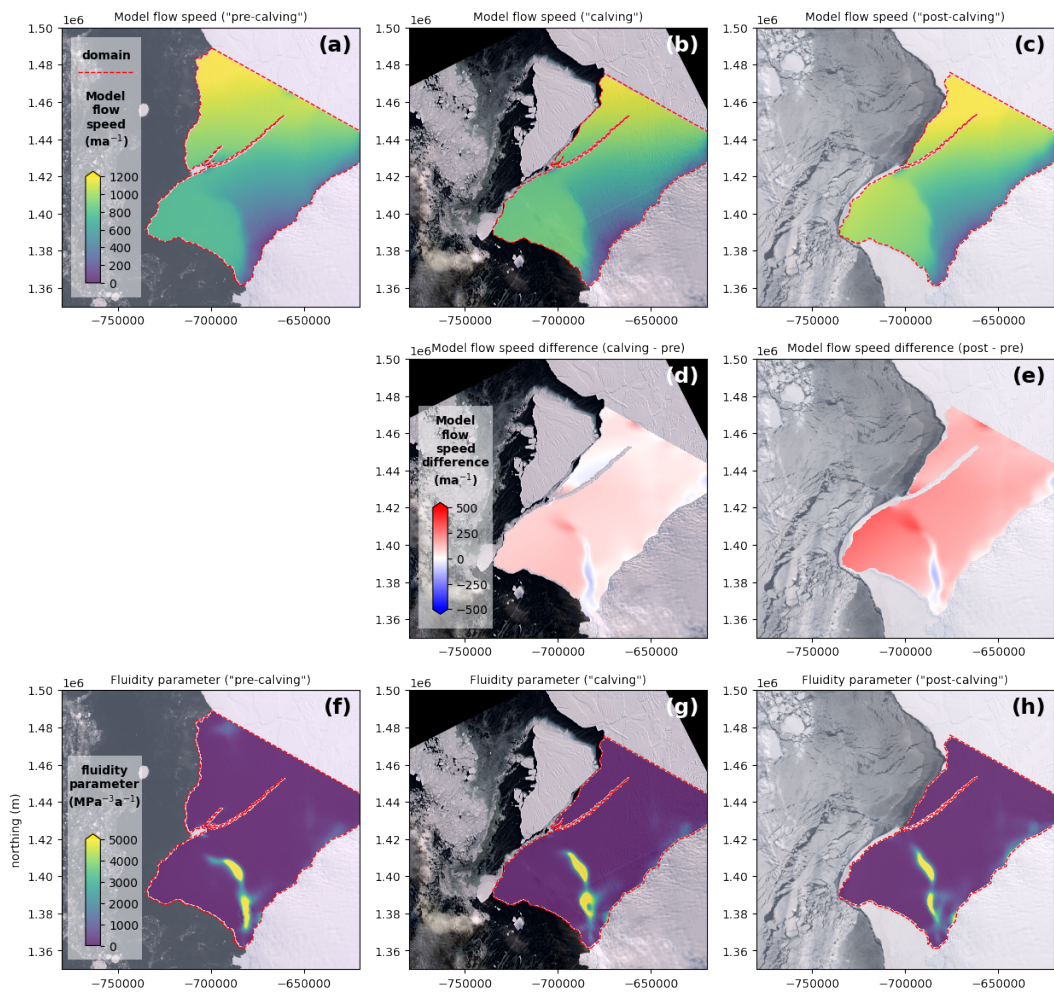

**Figure 17.** *icepack* model outputs. (a–c) Modeled ice flow speed. (d, e) Modeled ice flow speed change compared to prior to calving from NR. (f–h) Modeled fluidity parameter.



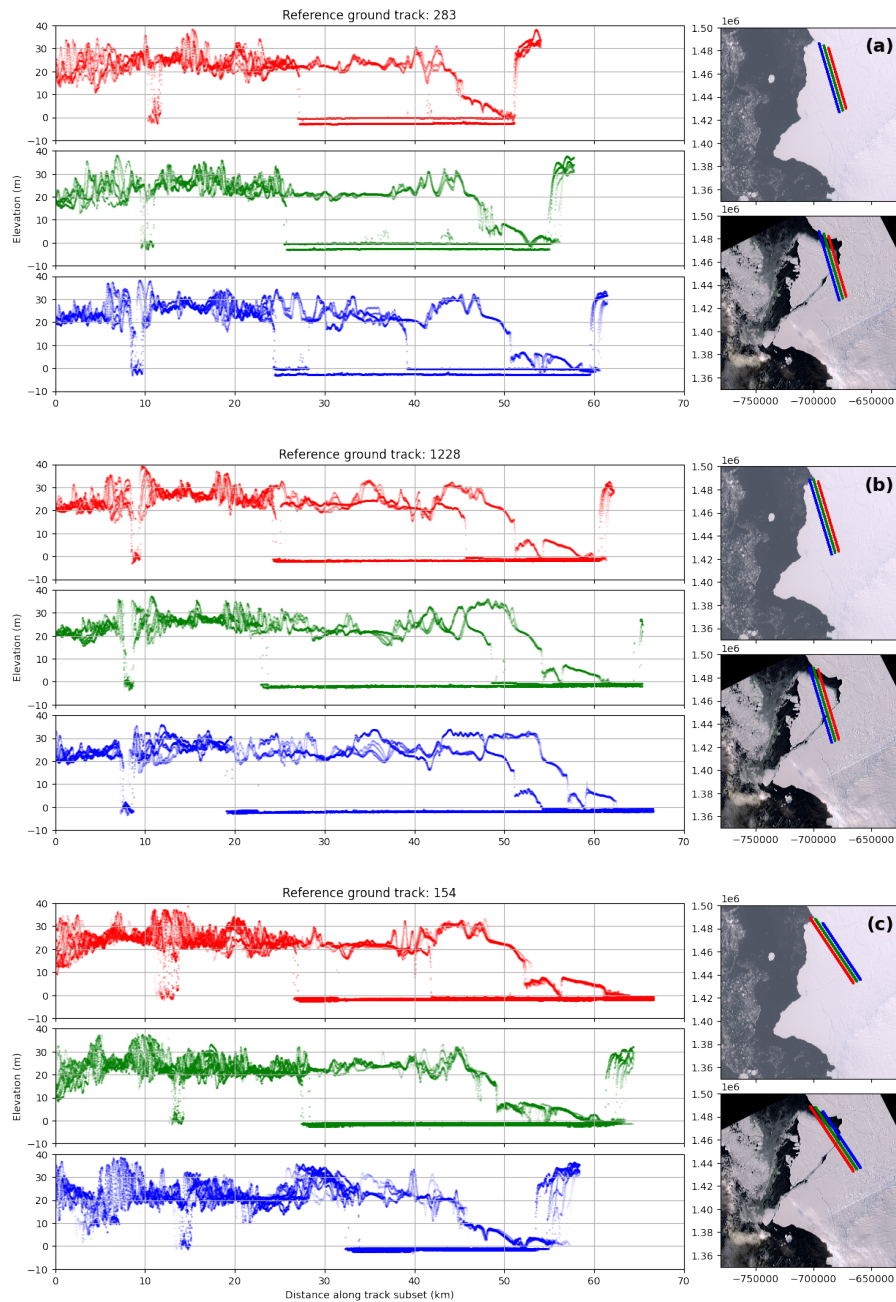

**Figure 18.** Cycle 5 to 15 SlideRule ICESat-2 elevations along RGTs which cross the calving fronts before and after calving from NR, for (a) RGT 283 (b) RGT 1228 (c) RGT 154. Red, green and blue denote different beam pairs, with strong and weak beams within each pair combined. Cycles are denoted by different color intensity, with intensity increasing with time.

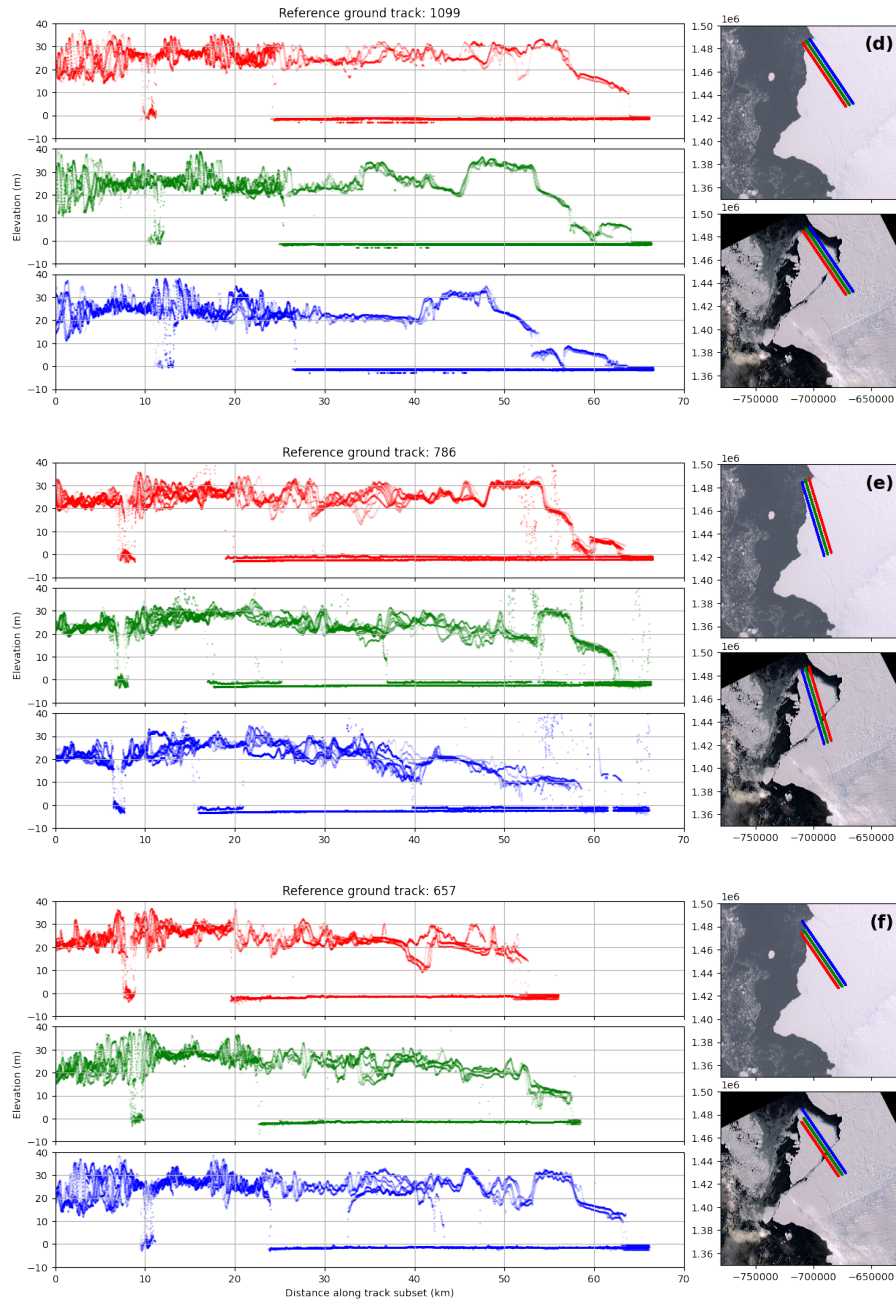

**Figure 19.** As Fig. S18 for (d) RGT 1099 (e) RGT 786 (f) RGT 657.

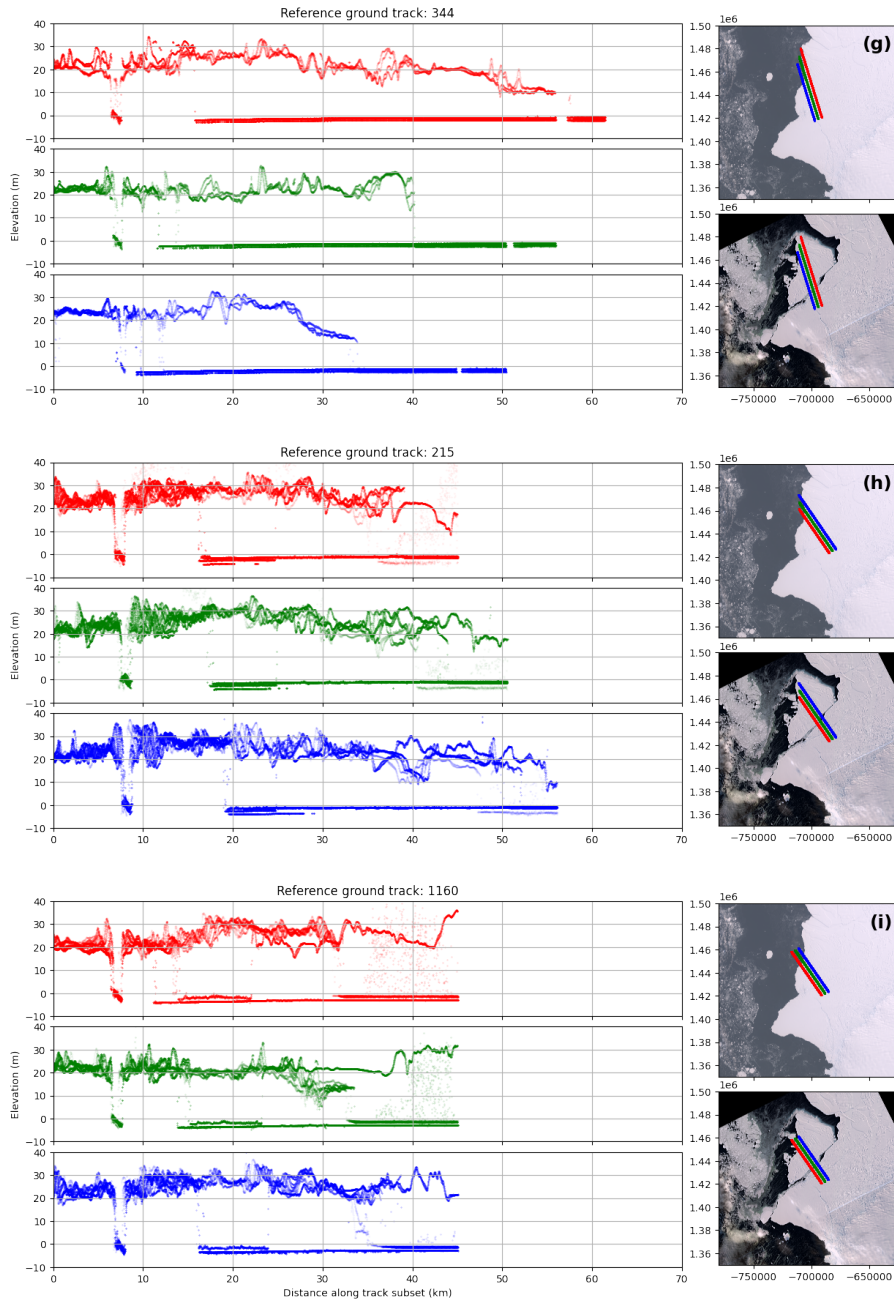

**Figure 20.** As Fig. S18 for (g) RGT 344 (h) RGT 215 (i) RGT 1160 .

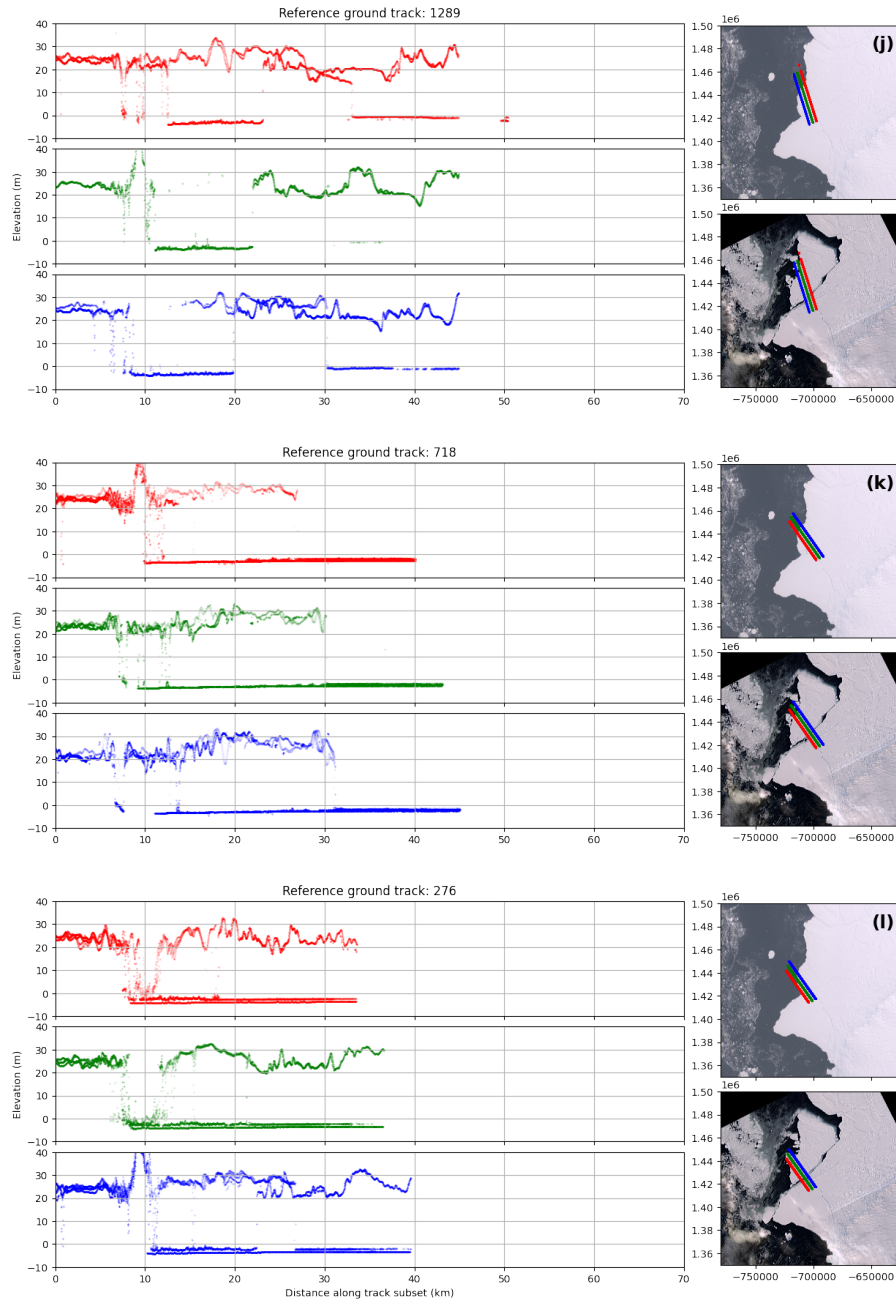

**Table 1.** WorldView-1-3 satellite images used for Halloween Crack width digitization along RGT 215 1LR, RGT 1160 3LR and RGT 786 2LR between the western pair of GNSS receivers.

| Platform    | Date       | ID                                   |
|-------------|------------|--------------------------------------|
| WorldView-1 | 2016-12-04 | WV01_20161204052108_10200100599B5200 |
| WorldView-3 | 2016-12-11 | WV03_20161211020616_1040010026561300 |
| WorldView-1 | 2017-11-17 | WV01_20171117134024_1020010068224000 |
| WorldView-1 | 2017-11-22 | WV01_20171122132254_10200100693F3E00 |
| WorldView-1 | 2018-03-13 | WV01_20180313131607_1020010072B34B00 |
| WorldView-2 | 2018-12-04 | WV02_20181204034234_10300100890D9800 |
| WorldView-1 | 2019-04-11 | WV01_20190411123307_102001007D73A200 |
| WorldView-3 | 2019-09-18 | WV03_20190918110239_10400100519B7300 |
| WorldView-1 | 2019-11-02 | WV01_20191102135533_1020010092CB5600 |
| WorldView-1 | 2019-12-02 | WV01_20191202135059_102001008F659100 |
| WorldView-3 | 2020-02-15 | WV03_20200215104103_1040010058701900 |
| WorldView-1 | 2020-03-22 | WV01_20200322134650_102001009325B500 |
| WorldView-3 | 2020-03-24 | WV03_20200324104234_104001005BCA7B00 |
| WorldView-1 | 2020-11-29 | WV01_20201129054413_102001009EA34400 |
| WorldView-2 | 2020-12-07 | WV02_20201207094927_10300100AE896000 |
| WorldView-3 | 2020-12-09 | WV03_20201209104515_104001006329D800 |
| WorldView-1 | 2021-01-19 | WV01_20210119054306_10200100A2246D00 |
| WorldView-1 | 2021-01-19 | WV01_20210119054212_10200100A22D6900 |
| WorldView-3 | 2022-01-03 | WV03_20220103020527_1040010072CE8500 |
| WorldView-2 | 2022-01-07 | WV02_20220107032223_10300100CB76C500 |

**Table 2.** WorldView-1-3 satellite images used for Halloween Crack width digitization along RGT 283 1LR, RGT 725 3LR and RGT 1099 2LR between the eastern pair of GNSS receivers.

| Platform    | Date       | ID                                   |
|-------------|------------|--------------------------------------|
| WorldView-1 | 2017-04-02 | WV01_20170402131921_1020010061410900 |
| WorldView-1 | 2017-11-17 | WV01_20171117134024_1020010068224000 |
| WorldView-1 | 2017-11-21 | WV01_20171121134611_102001006B664400 |
| WorldView-3 | 2019-01-08 | WV03_20190108024204_1040010045D59A00 |
| WorldView-1 | 2019-04-12 | WV01_20190412134450_1020010086A5AA00 |
| WorldView-2 | 2019-09-17 | WV02_20190917105429_1030010099561200 |
| WorldView-1 | 2019-11-02 | WV01_20191102135533_1020010092CB5600 |
| WorldView-1 | 2019-12-12 | WV01_20191212053208_102001008EA0FE00 |
| WorldView-1 | 2020-03-18 | WV01_20200318134132_1020010097598D00 |
| WorldView-1 | 2020-03-22 | WV01_20200322134704_1020010097B0DB00 |
| WorldView-3 | 2020-03-25 | WV03_20200325105744_104001005980FD00 |
| WorldView-1 | 2020-10-30 | WV01_20201030054839_102001009CBC1C00 |
| WorldView-1 | 2020-11-29 | WV01_20201129054413_102001009EA34400 |
| WorldView-1 | 2021-01-19 | WV01_20210119054244_10200100A1C45600 |
| WorldView-1 | 2021-09-07 | WV01_20210907132654_10200100B6265D00 |
| WorldView-1 | 2021-12-05 | WV01_20211205054543_10200100BA8E5500 |
| WorldView-2 | 2022-01-07 | WV02_20220107032223_10300100CB76C500 |
| WorldView-1 | 2022-02-15 | WV01_20220215133306_10200100BF581B00 |

**Table 3.** Halloween Crack width digitization along RGT 215 1LR, RGT 1160 3LR and RGT 786 2LR between the western pair of GNSS receivers from WorldView-1-3, used in Fig. 4.

| Platform | Date       | width (m) - opening width (wall-to-wall width) |                |               |               |                 |                 |
|----------|------------|------------------------------------------------|----------------|---------------|---------------|-----------------|-----------------|
|          |            | 1160 3L                                        | 1160 3R        | 215 1L        | 215 1R        | 786 2L          | 786 2R          |
| WV1      | 2016-12-04 | 16.7                                           | 16.8           | 21.8          | 14.0          | 16.5            | 16.8            |
| WV3      | 2016-12-11 | 17.9                                           | 18.5           | 17.4          | 14.8          | 18.3            | 17.6            |
| WV1      | 2017-11-17 | 224.7                                          | 219.6          | 230.0         | 228.8         | 211.7           | 214.1           |
| WV1      | 2017-11-22 | 230.9                                          | 222.1          | 232.1         | 230.8         | 215.1           | 212.2           |
| WV1      | 2018-03-13 | 318.8                                          | 319.4          | 318.1         | 321.0         | 303.8           | 301.6           |
| WV2      | 2018-12-04 | 533.8 (591.8)                                  | 548.8          | 515.0 (715.6) | 505.0 (730.4) | 543.0           | 538.6           |
| WV1      | 2019-04-11 | 612.7 (806.6)                                  | 617.8 (781.6)  | 619.0 (789.7) | 628.0 (798.9) | 645.8           | 649.6           |
| WV3      | 2019-09-18 | 725.1 (908.8)                                  | 715.3 (916.1)  | 732.0 (769.5) | 719.0 (843.6) | 765.3           | 832.3 (872.7)   |
| WV1      | 2019-11-02 | 768.6 (932.2)                                  | 760.7 (941.3)  | 750.3         | 806.2 (756.0) | 869.7 (909.5)   | 801.9 (950.7)   |
| WV1      | 2019-12-02 | 786.9 (946.1)                                  | 782.2 (954.0)  | 785.4         | 775.1         | 823.2 (968.4)   | 827.6 (987.9)   |
| WV3      | 2020-02-15 | 853.4 (965.0)                                  | 865.8 (1003.1) | 849.0         | 834.0         | -               | -               |
| WV1      | 2020-03-22 | 869.7 (937.7)                                  | 882.9 (998.5)  | 880.0         | 872.4         | 888.3 (1097.2)  | 889.5 (1097.0)  |
| WV3      | 2020-03-24 | 876.1 (937.7)                                  | 884.4 (1001.2) | 878.0         | 874.0         | 893.2 (1102.8)  | 894.5 (1100.5)  |
| WV1      | 2020-11-29 | 1070.7                                         | 1070.2         | 1118.3        | 1077.8        | 1108.4 (1220.2) | 1094.5 (1195.2) |
| WV2      | 2020-12-07 | 1078.7                                         | 1077.0         | 1088.4        | 1116.9        | 1114.2 (1225.8) | 1093.5 (1190.2) |
| WV3      | 2020-12-09 | 1081.7                                         | 1079.3         | 1120.3        | 1097.8        | 1115.8 (1227.5) | 1098.4 (1191.6) |
| WV1      | 2021-01-19 | 1103.3                                         | 1090.6         | 1112.3        | 1124.4        | 1121.2 (1204.6) | 1148.9          |
| WV1      | 2021-01-19 | 1102.8                                         | 1088.6         | 1118.5        | 1129.8        | -               | -               |
| WV3      | 2022-01-03 | 1141.8                                         | 1165.6         | 1123.8        | 1109.0        | 1172.0          | 1206.7          |
| WV2      | 2022-01-07 | 1146.9                                         | 1163.2         | 1126.4        | 1119.0        | -               | -               |

**Table 4.** Halloween Crack width digitization along RGT 283 1LR, RGT 725 3LR and RGT 1099 2LR between the eastern pair of GNSS receivers from WorldView-1-3, used in Fig. 5.

| Platform | Date       | width (m) - opening width |        |        |        |         |         |
|----------|------------|---------------------------|--------|--------|--------|---------|---------|
|          |            | 283 1L                    | 283 1R | 725 3L | 725 3R | 1099 2L | 1099 2R |
| WV1      | 2017-04-02 | 43.5                      | 41.7   | 36.3   | 39.3   | 36.0    | 39.3    |
| WV1      | 2017-11-17 | 142.6                     | 148.2  | 198.0  | 155.8  | 191.9   | 143.1   |
| WV1      | 2017-11-21 | 139.5                     | 154.2  | 191.1  | 155.9  | 191.9   | 162.2   |
| WV3      | 2019-01-08 | 412.3                     | 429.8  | 363.3  | 256.5  | 335.5   | 320.7   |
| WV1      | 2019-04-12 | 489.1                     | 466.6  | 385.9  | 400.7  | 394.6   | 415.3   |
| WV2      | 2019-09-17 | 460.9                     | 448.3  | 450.5  | 482.5  | 463.1   | 456.6   |
| WV1      | 2019-11-02 | 467.8                     | 474.2  | 511.4  | -      | 474.2   | 487.4   |
| WV1      | 2019-12-12 | 489.2                     | 482.6  | 519.2  | 526.3  | 504.9   | 487.2   |
| WV1      | 2020-03-18 | 534.8                     | 561.3  | 545.7  | 523.0  | 532.1   | 532.4   |
| WV1      | 2020-03-22 | 539.3                     | 560.5  | 531.7  | 512.8  | 531.5   | 534.4   |
| WV3      | 2020-03-25 | -                         | -      | 535.5  | 513.5  | -       | -       |
| WV1      | 2020-10-30 | 620.6                     | 619.5  | 780.0  | 774.6  | 639.1   | 616.7   |
| WV1      | 2020-11-29 | 631.9                     | 624.9  | 790.9  | 788.9  | 665.4   | 643.6   |
| WV1      | 2021-01-19 | 652.4                     | 707.2  | 810.0  | 777.4  | 685.9   | 679.5   |
| WV1      | 2021-09-07 | 682.8                     | 694.0  | 640.3  | 647.7  | 703.1   | 715.9   |
| WV1      | 2021-12-05 | -                         | -      | 662.4  | 663.1  | -       | -       |
| WV2      | 2022-01-07 | 691.7                     | 668.5  | 672.0  | 671.2  | 620.9   | 609.5   |
| WV1      | 2022-02-15 | 677.2                     | 682.9  | 672.2  | 673.3  | 654.4   | 625.9   |



**Table 5.** Landsat-8 OLI and Landsat-9 OLI-2 satellite images used for Halloween Crack width digitization. Imagery downloaded from <https://earthexplorer.usgs.gov>. Landsat Images courtesy of U.S. Geological Survey.

| Platform  | Date       | ID                                       |
|-----------|------------|------------------------------------------|
| Landsat-8 | 2017-11-12 | LC08_L1GT_182114_20171112_20201016_02_T2 |
| Landsat-8 | 2017-12-21 | LC08_L1GT_183114_20171221_20201016_02_T2 |
| Landsat-8 | 2017-12-30 | LC08_L1GT_182114_20171230_20201016_02_T2 |
| Landsat-8 | 2018-01-08 | LC08_L1GT_181114_20180108_20201016_02_T2 |
| Landsat-8 | 2018-02-14 | LC08_L1GT_184114_20180214_20201016_02_T2 |
| Landsat-8 | 2018-03-11 | LC08_L1GT_183114_20180311_20200901_02_T2 |
| Landsat-8 | 2018-09-28 | LC08_L1GT_182114_20180928_20200830_02_T2 |
| Landsat-8 | 2018-10-05 | LC08_L1GT_183114_20181005_20200830_02_T2 |
| Landsat-8 | 2018-10-12 | LC08_L1GT_184114_20181012_20201016_02_T2 |
| Landsat-8 | 2018-10-14 | LC08_L1GT_182114_20181014_20201016_02_T2 |
| Landsat-8 | 2018-10-21 | LC08_L1GT_183114_20181021_20201016_02_T2 |
| Landsat-8 | 2018-11-29 | LC08_L1GT_184114_20181129_20201016_02_T2 |
| Landsat-8 | 2019-01-18 | LC08_L1GT_182114_20190118_20201016_02_T2 |
| Landsat-8 | 2019-02-19 | LC08_L1GT_182114_20190219_20201016_02_T2 |
| Landsat-8 | 2019-03-23 | LC08_L1GT_182114_20190323_20200829_02_T2 |
| Landsat-8 | 2019-10-01 | LC08_L1GT_182114_20191001_20200825_02_T2 |
| Landsat-8 | 2019-10-17 | LC08_L1GT_182114_20191017_20201016_02_T2 |
| Landsat-8 | 2019-10-31 | LC08_L1GT_184114_20191031_20201016_02_T2 |
| Landsat-8 | 2019-11-02 | LC08_L1GT_182114_20191102_20201016_02_T2 |
| Landsat-8 | 2019-12-02 | LC08_L1GT_184114_20191202_20201016_02_T2 |
| Landsat-8 | 2019-12-27 | LC08_L1GT_183114_20191227_20201016_02_T2 |
| Landsat-8 | 2020-01-28 | LC08_L1GT_183114_20200128_20201016_02_T2 |
| Landsat-8 | 2020-02-20 | LC08_L1GT_184114_20200220_20201016_02_T2 |
| Landsat-8 | 2020-02-22 | LC08_L1GT_182114_20200222_20201016_02_T2 |
| Landsat-8 | 2020-09-24 | LC08_L1GT_183114_20200924_20201007_02_T2 |
| Landsat-8 | 2020-10-01 | LC08_L1GT_184114_20201001_20201007_02_T2 |
| Landsat-8 | 2020-10-10 | LC08_L1GT_183114_20201010_20201016_02_T2 |
| Landsat-8 | 2020-10-19 | LC08_L1GT_182114_20201019_20201105_02_T2 |
| Landsat-8 | 2020-11-18 | LC08_L1GT_184114_20201118_20210315_02_T2 |
| Landsat-8 | 2020-12-22 | LC08_L1GT_182114_20201222_20210310_02_T2 |
| Landsat-8 | 2021-01-07 | LC08_L1GT_182114_20210107_20210307_02_T2 |
| Landsat-8 | 2021-01-12 | LC08_L1GT_185114_20210112_20210308_02_T2 |
| Landsat-8 | 2021-01-19 | LC08_L1GT_186113_20210119_20210307_02_T2 |
| Landsat-8 | 2021-02-06 | LC08_L1GT_184114_20210206_20210302_02_T2 |
| Landsat-8 | 2021-03-01 | LC08_L1GT_185113_20210301_20210311_02_T2 |
| Landsat-8 | 2021-03-17 | LC08_L1GT_185114_20210317_20210328_02_T2 |
| Landsat-8 | 2021-03-24 | LC08_L1GT_186113_20210324_20210401_02_T2 |
| Landsat-8 | 2021-04-02 | LC08_L1GT_185113_20210402_20210408_02_T2 |
| Landsat-8 | 2021-04-04 | LC08_L1GT_183114_20210404_20210408_02_T2 |
| Landsat-8 | 2021-09-20 | LC08_L1GT_182114_20210920_20210924_02_T2 |
| Landsat-8 | 2021-09-25 | LC08_L1GT_185113_20210925_20210930_02_T2 |
| Landsat-8 | 2021-10-02 | LC08_L1GT_186113_20211002_20211013_02_T2 |
| Landsat-8 | 2021-10-06 | LC08_L1GT_182114_20211006_20211013_02_T2 |
| Landsat-8 | 2021-10-20 | LC08_L1GT_184114_20211020_20211026_02_T2 |
| Landsat-8 | 2021-11-05 | LC08_L1GT_184114_20211105_20211116_02_T2 |
| Landsat-8 | 2021-11-07 | LC08_L1GT_182114_20211107_20211117_02_T2 |
| Landsat-8 | 2021-12-05 | LC08_L1GT_186113_20211205_20211215_02_T2 |
| Landsat-8 | 2021-12-25 | LC08_L1GT_182114_20211225_20211230_02_T2 |
| Landsat-9 | 2021-12-31 | LC09_L1GT_184114_20211231_20220121_02_T2 |

**Table 6.** Halloween Crack width digitization along RGT 215 1LR, RGT 1160 3LR and RGT 786 2LR between the western pair of GNSS receivers from Landsat-8 and Landsat-9, used in Fig. 4.

| Platform  | Date       | width (m) - opening width (wall-to-wall width) |           |           |           |             |             |
|-----------|------------|------------------------------------------------|-----------|-----------|-----------|-------------|-------------|
|           |            | 1160 3L                                        | 1160 3R   | 215 1L    | 215 1R    | 786 2L      | 786 2R      |
| Landsat-8 | 2017-11-12 | 221                                            | 220       | 224       | 223       | 192         | 195         |
| Landsat-8 | 2017-12-21 | 241                                            | 240       | 251       | 246       | 223         | 220         |
| Landsat-8 | 2017-12-30 | 246                                            | 245       | 268       | 252       | 232         | 225         |
| Landsat-8 | 2018-01-08 | 260                                            | 255       | 259       | 247       | 243         | 244         |
| Landsat-8 | 2018-02-14 | 269                                            | 275       | 270       | 267       | 272         | 268         |
| Landsat-8 | 2018-03-11 | 296                                            | 294       | 283       | 293       | 284         | 281         |
| Landsat-8 | 2018-09-28 | 475                                            | 464       | 404 (645) | 401 (623) | 475         | 456         |
| Landsat-8 | 2018-10-05 | 477                                            | 472       | 427 (663) | 420 (636) | 483         | 462         |
| Landsat-8 | 2018-10-12 | 484                                            | 485       | 435 (671) | 439 (649) | 500         | 478         |
| Landsat-8 | 2018-10-14 | 485                                            | 490       | 442 (669) | 455 (659) | 497         | 476         |
| Landsat-8 | 2018-10-21 | 493                                            | 507       | 442 (665) | 446 (663) | 494         | 483         |
| Landsat-8 | 2018-11-29 | 498 (576)                                      | 544       | 490 (706) | 494 (709) | 532         | 526         |
| Landsat-8 | 2019-01-18 | 536 (684)                                      | 552 (638) | 513 (732) | 513 (740) | 568         | 576         |
| Landsat-8 | 2019-02-19 | 527 (729)                                      | 576 (715) | 534 (746) | 530 (744) | 602         | 597         |
| Landsat-8 | 2019-03-23 | 538 (758)                                      | 584 (763) | 558 (738) | 543 (740) | 607         | 605         |
| Landsat-8 | 2019-10-01 | 676 (903)                                      | 681 (904) | 653 (732) | 667 (797) | 799         | 785 (919)   |
| Landsat-8 | 2019-10-17 | 697 (912)                                      | 685 (923) | 685 (741) | 681 (785) | 788 (856)   | 815 (945)   |
| Landsat-8 | 2019-10-31 | 687 (899)                                      | 720 (940) | 682 (746) | 770       | 836 (927)   | 783 (944)   |
| Landsat-8 | 2019-11-02 | 704 (914)                                      | 720 (931) | 701 (750) | 774       | 821 (913)   | 780 (964)   |
| Landsat-8 | 2019-12-02 | 747 (928)                                      | 713 (924) | 772       | 761       | 835 (985)   | 803 (1007)  |
| Landsat-8 | 2019-12-27 | 791 (950)                                      | 752 (947) | 765       | 796       | 811 (966)   | 832 (1034)  |
| Landsat-8 | 2020-01-28 | 799 (947)                                      | 815 (983) | 808       | 805       | 860 (1038)  | 831 (1060)  |
| Landsat-8 | 2020-02-20 | 819 (946)                                      | 813 (987) | 838       | 826       | 871 (1084)  | 852 (1087)  |
| Landsat-8 | 2020-02-22 | 824 (952)                                      | 805 (988) | 838       | 832       | 863 (1083)  | 863 (1099)  |
| Landsat-8 | 2020-09-24 | 993                                            | 979       | 979       | 990       | 979 (1170)  | 973 (1150)  |
| Landsat-8 | 2020-10-01 | 992                                            | 992       | 982       | 993       | 986 (1172)  | 982 (1154)  |
| Landsat-8 | 2020-10-10 | 1006                                           | 1000      | 1015      | 1012      | 1001(1184)  | 1001 (1171) |
| Landsat-8 | 2020-10-19 | 1015                                           | 1004      | 1026      | 1019      | 1020 (1194) | 1047 (1184) |
| Landsat-8 | 2020-11-18 | 1046                                           | 1052      | 1077      | 1043      | 1064 (1214) | 1063 (1200) |
| Landsat-8 | 2020-12-22 | 1068                                           | 1062      | 1104      | 1111      | 1094 (1223) | 1071 (1157) |
| Landsat-8 | 2021-01-07 | 1077                                           | 1066      | 1104      | 1106      | 1094 (1210) | 1074 (1149) |
| Landsat-8 | 2021-01-12 | 1100                                           | 1091      | 1127      | 1130      | 1092 (1202) | 1075 (1140) |
| Landsat-8 | 2021-01-19 | 1108                                           | 1095      | 1114      | 1130      | 1108 (1202) | 1080 (1139) |
| Landsat-8 | 2021-02-06 | 1082                                           | 1066      | 1101      | 1106      | 1130 (1198) | 1081 (1130) |
| Landsat-8 | 2021-03-01 | 1101                                           | 1106      | 1121      | 1120      | 1047 (1115) | 1110        |
| Landsat-8 | 2021-03-17 | 1101                                           | 1096      | 1094      | 1106      | 1096        | 1105        |
| Landsat-8 | 2021-03-24 | 1094                                           | 1099      | 1100      | 1100      | 1099        | 1085        |
| Landsat-8 | 2021-04-02 | 1113                                           | 1093      | 1106      | 1095      | 1091        | 1084        |
| Landsat-8 | 2021-04-04 | 1084                                           | 1088      | 1078      | 1082      | 1108        | 1077        |
| Landsat-8 | 2021-09-20 | 1132                                           | 1126      | 1052      | 1066      | 1067        | 1050        |
| Landsat-8 | 2021-09-25 | 1130                                           | 1127      | 1073      | 1071      | 1076        | 1073        |
| Landsat-8 | 2021-10-02 | 1158                                           | 1139      | 1081      | 1089      | 1080        | 1082        |
| Landsat-8 | 2021-10-06 | 1152                                           | 1145      | 1068      | 1069      | 1076        | 1083        |
| Landsat-8 | 2021-10-20 | 1162                                           | 1154      | 1067      | 1080      | 1089        | 1094        |
| Landsat-8 | 2021-11-05 | 1163                                           | 1166      | 1070      | 1085      | 1090        | 1118        |
| Landsat-8 | 2021-11-07 | 1166                                           | 1171      | 1076      | 1080      | 1104        | 1127        |
| Landsat-8 | 2021-12-05 | 1136                                           | 1172      | 1096      | 1087      | 1137        | 1152        |
| Landsat-8 | 2021-12-25 | 1134                                           | 1179      | 1104      | 1096      | 1165        | 1186        |
| Landsat-9 | 2021-12-31 | 1134                                           | 1164      | 1117      | 1107      | 1166        | 1210        |

**Table 7.** Halloween Crack width digitization along RGT 283 1LR, RGT 725 3LR and RGT 1099 2LR between the western pair of GNSS receivers from Landsat-8 and Landsat-9, used in Fig. 5.

| Platform  | Date       | width (m) - opening width |        |        |        |         |         |
|-----------|------------|---------------------------|--------|--------|--------|---------|---------|
|           |            | 283 1L                    | 283 1R | 725 3L | 725 3R | 1099 2L | 1099 2R |
| Landsat-8 | 2017-11-12 | 123                       | 138    | 164    | 131    | 191     | 172     |
| Landsat-8 | 2017-12-21 | 172                       | 166    | 181    | 151    | 203     | 194     |
| Landsat-8 | 2017-12-30 | 171                       | 175    | 179    | 162    | 209     | 204     |
| Landsat-8 | 2018-01-08 | 174                       | 193    | 174    | 153    | 195     | 222     |
| Landsat-8 | 2018-02-14 | 207                       | 189    | 189    | 171    | 203     | 209     |
| Landsat-8 | 2018-03-11 | 193                       | 203    | 185    | 178    | 200     | 209     |
| Landsat-8 | 2018-09-28 | 272                       | 279    | 392    | 310    | 291     | 289     |
| Landsat-8 | 2018-10-05 | 288                       | 289    | 380    | 324    | 304     | 310     |
| Landsat-8 | 2018-10-12 | 305                       | 318    | 359    | 337    | 305     | 308     |
| Landsat-8 | 2018-10-14 | 303                       | 313    | 370    | 340    | 305     | 309     |
| Landsat-8 | 2018-10-21 | 316                       | 331    | 361    | 344    | 313     | 318     |
| Landsat-8 | 2018-11-29 | 335                       | 332    | 372    | 341    | 318     | 323     |
| Landsat-8 | 2019-01-18 | 414                       | 443    | 351    | 341    | 351     | 331     |
| Landsat-8 | 2019-02-19 | 485                       | 475    | 367    | 370    | 357     | 334     |
| Landsat-8 | 2019-03-23 | 465                       | 481    | 367    | 362    | 349     | 367     |
| Landsat-8 | 2019-10-01 | 452                       | 439    | 456    | 488    | 445     | 450     |
| Landsat-8 | 2019-10-17 | 459                       | 452    | 472    | 491    | 464     | 451     |
| Landsat-8 | 2019-10-31 | 438                       | 444    | 457    | 471    | 455     | 452     |
| Landsat-8 | 2019-11-02 | 472                       | 464    | 488    | 495    | 462     | 474     |
| Landsat-8 | 2019-12-02 | 479                       | 481    | 502    | 509    | 480     | 482     |
| Landsat-8 | 2019-12-27 | 478                       | 481    | 516    | 491    | 483     | 501     |
| Landsat-8 | 2020-01-28 | 490                       | 510    | 506    | 496    | 506     | 507     |
| Landsat-8 | 2020-02-20 | 506                       | 507    | 508    | 482    | 508     | 515     |
| Landsat-8 | 2020-02-22 | 513                       | 527    | 501    | 492    | 520     | 522     |
| Landsat-8 | 2020-09-24 | 586                       | 565    | 691    | 730    | 579     | 578     |
| Landsat-8 | 2020-10-01 | 597                       | 574    | 723    | 747    | 595     | 581     |
| Landsat-8 | 2020-10-10 | 604                       | 585    | 727    | 782    | 604     | 588     |
| Landsat-8 | 2020-10-19 | 605                       | 592    | 770    | 780    | 614     | 590     |
| Landsat-8 | 2020-11-18 | 621                       | 569    | 774    | 791    | 623     | 618     |
| Landsat-8 | 2020-12-22 | 633                       | 651    | 799    | 786    | 650     | 651     |
| Landsat-8 | 2021-01-07 | 641                       | 667    | 780    | 800    | 669     | 667     |
| Landsat-8 | 2021-01-12 | 635                       | 684    | 807    | 724    | 683     | 688     |
| Landsat-8 | 2021-01-19 | 640                       | 674    | 796    | 756    | 674     | 681     |
| Landsat-8 | 2021-02-06 | 653                       | 714    | 802    | 794    | 664     | 670     |
| Landsat-8 | 2021-03-17 | 761                       | 775    | 694    | 664    | 608     | 664     |
| Landsat-8 | 2021-03-24 | 770                       | 801    | 694    | 647    | 595     | 674     |
| Landsat-8 | 2021-04-02 | 760                       | 793    | 659    | 631    | 564     | 645     |
| Landsat-8 | 2021-04-04 | 760                       | 795    | 645    | 629    | 562     | 673     |
| Landsat-8 | 2021-09-20 | 693                       | 643    | 616    | 614    | 713     | 690     |
| Landsat-8 | 2021-09-25 | 679                       | 657    | 624    | 614    | 702     | 665     |
| Landsat-8 | 2021-10-02 | 687                       | 663    | 640    | 631    | 684     | 688     |
| Landsat-8 | 2021-10-06 | 682                       | 671    | 635    | 637    | 688     | 718     |
| Landsat-8 | 2021-10-20 | 673                       | 682    | 650    | 637    | 692     | 723     |
| Landsat-8 | 2021-11-05 | 685                       | 689    | 640    | 645    | 667     | 698     |
| Landsat-8 | 2021-11-07 | 670                       | 686    | 647    | 657    | 665     | 689     |
| Landsat-8 | 2021-12-05 | 693                       | 678    | 668    | 662    | 643     | 684     |
| Landsat-8 | 2021-12-25 | 694                       | 668    | 666    | 672    | 640     | 653     |
| Landsat-9 | 2021-12-31 | 697                       | 652    | 676    | 655    | 623     | 620     |

**Table 8.** Sentinel-1 SAR and Sentinel-2 and Landsat-8 optical imagery used for ice flow modeling. Ice flow velocity was calculated by applying a feature tracking algorithm to Sentinel-1 SAR scene pairs separated by 12 days using the SeNtinel Applications Platform (SNAP). The model domain was defined using Sentinel-2 and Landsat-8 images.

| Period                                                       | Sentinel-1 pair and Sentinel-2/Landsat-8 images                     |
|--------------------------------------------------------------|---------------------------------------------------------------------|
| “Pre-calving”                                                | S1A_IW_GRDH_1SSH_20200228T035038_20200228T035107_031447_039EDA_15B1 |
|                                                              | S1A_IW_GRDH_1SSH_20200311T035039_20200311T035107_031622_03A4ED_53C5 |
|                                                              | LC08_L1GT_184113_20200220_20201016_02_T2                            |
|                                                              | LC08_L1GT_184114_20200220_20201016_02_T2                            |
| “Calving”                                                    | S1A_IW_GRDH_1SSH_20210318T035044_20210318T035113_037047_045C31_C4C6 |
|                                                              | S1A_IW_GRDH_1SSH_20210330T035045_20210330T035113_037222_04623E_9BAF |
|                                                              | S2B_MSIL2A_20210314T100059_N0214_R093_T26CNB_20210314T120106        |
|                                                              | S2B_MSIL2A_20210314T100059_N0214_R093_T26CNA_20210314T120106        |
|                                                              | S2B_MSIL2A_20210314T100059_N0214_R093_T26CMA_20210314T120106        |
| S2B_MSIL1C_20210314T100059_N0209_R093_T26CMB_20210314T113145 |                                                                     |
| “Post-calving”                                               | S1A_IW_GRDH_1SSH_20211125T035053_20211125T035122_040722_04D518_F687 |
|                                                              | S1A_IW_GRDH_1SSH_20211207T035053_20211207T035121_040897_04DB2E_4704 |
|                                                              | LC08_L1GT_184113_20211020_20211026_02_T2                            |
|                                                              | LC08_L1GT_184114_20211020_20211026_02_T2                            |

**Table 9.** Inputs to *icepack* (diagnostic) inverse and additional diagnostic model runs and calculated HC opening rates. Inverse models take SNAP feature tracked velocity fields (Table S8) as initial-guess inputs, and output modeled velocity and fluidity fields. These outputs are used as inputs to the additional diagnostic model runs. HC opening rates between the western and eastern GNSS pairs are calculated as the difference in the rift perpendicular components of velocity north (N perp.) and south (S perp.) of the rift.

| Model                     | Velocity                             | Fluidity                 | Geometry<br>(extent/rift) | Temp.<br>(K) | N perp.<br>(m a <sup>-1</sup> ) | Western<br>S perp.<br>(m a <sup>-1</sup> ) | <b>rate</b><br>(m a <sup>-1</sup> ) | N perp.<br>(m a <sup>-1</sup> ) | Eastern<br>S perp.<br>(m a <sup>-1</sup> ) | <b>rate</b><br>(m a <sup>-1</sup> ) |
|---------------------------|--------------------------------------|--------------------------|---------------------------|--------------|---------------------------------|--------------------------------------------|-------------------------------------|---------------------------------|--------------------------------------------|-------------------------------------|
| “pre-calving”<br>Inverse  | FT pre<br>(output:<br>model pre)     | (output:<br>model pre)   | pre/pre                   | 253          | 416.7                           | 159.8                                      | <b>257.0</b>                        | 649.0                           | 455.9                                      | <b>193.1</b>                        |
| “calving”<br>Inverse      | FT calve<br>(output:<br>model calve) | (output:<br>model calve) | calve/calve               | 253          | 227.7                           | 174.1                                      | <b>53.6</b>                         | 505.1                           | 468.7                                      | <b>36.4</b>                         |
| “post-calving”<br>Inverse | FT post<br>(output:<br>model post)   | (output:<br>model post)  | post/post                 | 253          | 327.9                           | 191.4                                      | <b>136.5</b>                        | 605.2                           | 517.6                                      | <b>87.6</b>                         |
| Diagnostic <sub>1</sub>   | model pre                            | model pre                | pre/pre                   | 253          | 463.6                           | 178.2                                      | <b>285.4</b>                        | 650.4                           | 461.4                                      | <b>189.0</b>                        |
| Diagnostic <sub>2</sub>   | model pre                            | model pre                | calve/pre                 | 253          | 461.8                           | 174.1                                      | <b>287.7</b>                        | 658.1                           | 459.1                                      | <b>199.0</b>                        |
| Diagnostic <sub>3</sub>   | model pre                            | model pre                | post/pre                  | 253          | 497.9                           | 179.2                                      | <b>318.7</b>                        | 671.6                           | 468.9                                      | <b>202.7</b>                        |
| Diagnostic <sub>4</sub>   | model pre                            | model pre                | calve/calve               | 253          | 430.4                           | 184.7                                      | <b>245.7</b>                        | 650.2                           | 471.5                                      | <b>178.7</b>                        |
| Diagnostic <sub>5</sub>   | model pre                            | model pre                | post/post                 | 253          | 428.9                           | 180.3                                      | <b>248.7</b>                        | 659.6                           | 467.4                                      | <b>192.1</b>                        |
| Diagnostic <sub>6</sub>   | model calve                          | model pre                | calve/pre                 | 253          | 268.5                           | 175.3                                      | <b>93.2</b>                         | 515.6                           | 449.2                                      | <b>66.4</b>                         |
| Diagnostic <sub>7</sub>   | model post                           | model pre                | post/pre                  | 253          | 417.3                           | 157.6                                      | <b>259.7</b>                        | 635.1                           | 469.0                                      | <b>166.1</b>                        |
| Diagnostic <sub>8</sub>   | model calve                          | model pre                | calve/calve               | 253          | 250.6                           | 183.9                                      | <b>66.7</b>                         | 513.5                           | 457.7                                      | <b>55.8</b>                         |
| Diagnostic <sub>9</sub>   | model post                           | model pre                | post/post                 | 253          | 340.9                           | 159.3                                      | <b>181.5</b>                        | 622.7                           | 467.9                                      | <b>154.8</b>                        |
| “pre-calving”<br>Inverse  | FT pre<br>(output:<br>model pre)     | (output:<br>model pre)   | pre/pre                   | 260          | 394.8                           | 157.8                                      | <b>237.0</b>                        | 633.2                           | 495.8                                      | <b>137.4</b>                        |
| “calving”<br>Inverse      | FT calve<br>(output:<br>model calve) | (output:<br>model calve) | calve/calve               | 260          | 226.2                           | 175.6                                      | <b>50.6</b>                         | 504.0                           | 475.7                                      | <b>28.3</b>                         |
| “post-calving”<br>Inverse | FT post<br>(output:<br>model post)   | (output:<br>model post)  | post/post                 | 260          | 326.2                           | 193.0                                      | <b>133.3</b>                        | 603.1                           | 524.8                                      | <b>78.3</b>                         |
| Diagnostic <sub>1</sub>   | model pre                            | model pre                | pre/pre                   | 260          | 425.6                           | 177.6                                      | <b>248.5</b>                        | 634.9                           | 500.9                                      | <b>134.0</b>                        |
| Diagnostic <sub>2</sub>   | model pre                            | model pre                | calve/pre                 | 260          | 415.3                           | 180.6                                      | <b>234.7</b>                        | 625.1                           | 506.6                                      | <b>118.5</b>                        |
| Diagnostic <sub>3</sub>   | model pre                            | model pre                | post/pre                  | 260          | 514.1                           | 184.6                                      | <b>329.5</b>                        | 642.9                           | 520.3                                      | <b>122.6</b>                        |
| Diagnostic <sub>4</sub>   | model pre                            | model pre                | calve/calve               | 260          | 351.9                           | 182.1                                      | <b>169.7</b>                        | 628.5                           | 509.5                                      | <b>119.0</b>                        |
| Diagnostic <sub>5</sub>   | model pre                            | model pre                | post/post                 | 260          | 335.7                           | 176.7                                      | <b>159.0</b>                        | 638.0                           | 500.5                                      | <b>137.5</b>                        |
| Diagnostic <sub>6</sub>   | model calve                          | model pre                | calve/pre                 | 260          | 199.8                           | 181.0                                      | <b>18.8</b>                         | 495.6                           | 496.4                                      | <b>-0.8</b>                         |
| Diagnostic <sub>7</sub>   | model post                           | model pre                | post/pre                  | 260          | 324.8                           | 162.2                                      | <b>162.7</b>                        | 615.4                           | 514.7                                      | <b>100.7</b>                        |
| Diagnostic <sub>8</sub>   | model calve                          | model pre                | calve/calve               | 260          | 182.5                           | 187.9                                      | <b>-5.4</b>                         | 494.6                           | 502.0                                      | <b>-7.4</b>                         |
| Diagnostic <sub>9</sub>   | model post                           | model pre                | post/post                 | 260          | 251.9                           | 160.7                                      | <b>91.2</b>                         | 604.6                           | 503.7                                      | <b>100.9</b>                        |

## References

- Andersen, O. B. and Knudsen, P.: The DNSC08 mean sea surface and mean dynamic topography, *Journal of Geophysical Research*, p. C11, <https://doi.org/10.1029/2008JC005179>, 2009.
- 170 De Rydt, J., Gudmundsson, G. H., Nagler, T., Wuite, J., and King, E. C.: Recent rift formation and impact on the structural integrity of the Brunt Ice Shelf, East Antarctica, *The Cryosphere*, 12, 505–520, <https://doi.org/10.5194/tc-12-505-2018>, 2018.
- Gardner, A. S., Moholdt, G., Scambos, T., Fahnestock, M., Ligtenberg, S., van den Broeke, M., and Nilsson, J.: Increased West Antarctic and unchanged East Antarctic ice discharge over the last 7 years, *The Cryosphere*, 12, 521–547, <https://doi.org/10.5194/tc-12-521-2018>, 2018.
- 175 Gardner, A. S., Fahnestock, M., and Scambos, T.: ITS\_LIVE Regional Glacier and Ice Sheet Surface Velocities, Data archived at National Snow and Ice Data Center, <https://doi.org/10.5067/6II6VW8LLWJ7>, 2020.
- King, E. C., De Rydt, J., and Gudmundsson, G. H.: The internal structure of the Brunt Ice Shelf from ice-penetrating radar analysis and implications for ice shelf fracture, *The Cryosphere*, 12, 3361–3372, <https://doi.org/10.5194/tc-12-3361-2018>, 2018.
- Morlighem, M.: MEaSURES BedMachine Antarctica, Version 2. [floating ice mask, firn air content], Boulder, Colorado USA. NASA National Snow and Ice Data Center Distributed Active Archive Center, <https://doi.org/10.5067/E1QL9HFQ7A8M>, date Accessed: 2021, 180 2020.
- Pavlis, N. K., Holmes, S. A., Kenyon, S. C., and Factor, J. K.: The development and evaluation of the Earth Gravitational Model 2008 (EGM2008), *Journal of Geophysical Research: Solid Earth*, 117, <https://doi.org/10.1029/2011JB008916>, 2012.
- Swinski, J. P., Shean, D., and Sutterley, T.: ICESat2-SlideRule/sliderule-icesat2: v1.4.3, <https://doi.org/10.5281/zenodo.6600555>, 2022.
